# Supplementary material for: Benchmark values of chemical potential and chemical hardness for atoms and atomic ions (including unstable anions) from the energies of isoelectronic series
Source: Royal Society of Chemistry journal article supplement (doi:10.1039/c6cp04533b), 2016-01-01
Supplement: c6cp04533b1.xlsx [file c6cp04533b1.xlsx]

## Sheet: IPs,Mu,Eta
							Electron Removal Energies (Ionization Potentials) of Atoms and Atomic Ions (eV)
											Charge
Atomic #	Element	Symbol	-2	-1	0	1	2	3	4	5	6	7	8	9	10	11	12	13	14	15	16	17	18	19	20	21	22	23	24	25	26	27	28	29	30	31	32	33	34	35	36	37	38	39	40	41	42	43	44
1	Hydrogen	H		0.754195	13.5984
2	Helium	He		0	24.5874	54.4178
3	Lithium	Li		0.618049	5.39172	75.64	122.454
4	Beryllium	Be		0	9.3227	18.2111	153.897	217.719
5	Boron	B		0.279723	8.29802	25.1548	37.9306	259.375	340.226
6	Carbon	C		1.26212	11.2603	24.3833	47.8878	64.4939	392.087	489.993
7	Nitrogen	N		0	14.5341	29.6013	47.4492	77.4735	97.8902	552.072	667.046
8	Oxygen	O		1.46111	13.6181	35.1211	54.9355	77.4135	113.899	138.12	739.29	871.41
9	Fluorine	F		3.40119	17.4228	34.9708	62.7084	87.1398	114.243	157.165	185.186	953.911	1103.12
10	Neon	Ne		0	21.5645	40.963	63.45	97.12	126.21	157.93	207.276	239.099	1195.83	1362.2
11	Sodium	Na		0.547926	5.13908	47.2864	71.62	98.91	138.4	172.18	208.5	264.25	299.864	1465.12	1648.7
12	Magnesium	Mg		0	7.64623	15.0353	80.1437	109.266	141.27	186.76	225.02	265.96	328.06	367.5	1761.81	1962.66
13	Aluminum	Al		0.43283	5.98577	18.8285	28.4476	119.992	153.825	190.49	241.76	284.66	330.13	398.75	442	2085.98	2304.14
14	Silicon	Si		1.38952	8.15168	16.3458	33.493	45.1418	166.767	205.27	246.5	303.54	351.12	401.37	476.36	523.42	2437.63	2673.18
15	Phosphorus	P		0.746609	10.4867	19.7695	30.2027	51.4439	65.0251	220.421	263.57	309.6	372.13	424.4	479.46	560.8	611.74	2816.91	3069.84
16	Sulfur	S		2.0771	10.36	23.3379	34.79	47.222	72.5945	88.053	280.948	328.75	379.55	447.5	504.8	564.44	652.2	707.01	3223.78	3494.19
17	Chlorine	Cl		3.61272	12.9676	23.8136	39.61	53.4652	67.8	97.03	114.196	348.28	400.06	455.63	529.28	591.99	656.71	749.76	809.4	3658.52	3946.3
18	Argon	Ar		0	15.7596	27.6297	40.74	59.81	75.02	91.009	124.323	143.46	422.45	478.69	538.96	618.26	686.1	755.74	854.77	918.03	4120.89	4426.23
19	Potassium	K		0.501459	4.34066	31.63	45.806	60.91	82.66	99.4	117.56	154.88	175.817	503.8	564.7	629.4	714.6	786.6	861.1	968	1033.4	4610.8	4934.05
20	Calcium	Ca		0.02455	6.11316	11.8717	50.9131	67.27	84.5	108.78	127.2	147.24	188.54	211.275	591.9	657.2	726.6	817.6	894.5	974	1087	1157.8	5128.8	5469.86
21	Scandium	Sc		0.188	6.56149	12.7998	24.7567	73.4894	91.65	110.68	138	158.1	180.03	225.18	249.798	687.36	756.7	830.8	927.5	1009	1094	1213	1287.97	5674.8	6033.71
22	Titanium	Ti		0.079	6.82812	13.5755	27.4917	43.2672	99.3	119.53	140.8	170.4	192.1	215.92	265.07	291.5	787.84	863.1	941.9	1044	1131	1221	1346	1425.4	6249	6625.82
23	Vanadium	V		0.526	6.74619	14.618	29.311	46.709	65.2817	128.13	150.6	173.4	205.8	230.5	255.7	308.1	336.277	896	976	1060	1168	1260	1355	1486	1569.6	6851.3	7246.12
24	Chromium	Cr		0.67584	6.76651	16.4857	30.96	49.16	69.46	90.6349	160.18	184.7	209.3	244.4	270.8	298	354.8	384.168	1010.6	1097	1185	1299	1396	1496	1634	1721.4	7481.7	7894.81
25	Manganese	Mn		0	7.43402	15.64	33.668	51.2	72.4	95.6	119.203	194.5	221.8	248.3	286	314.4	343.6	403	435.163	1134.7	1224	1317	1437	1539	1644	1788	1879.9	8140.6	8571.94
26	Iron	Fe		0.151	7.9024	16.1877	30.652	54.8	75	99.1	124.98	151.06	233.6	262.1	290.2	330.8	361	392.2	457	489.256	1266	1358	1456	1582	1689	1799	1950	2023	8828	9277.69
27	Cobalt	Co		0.6633	7.88101	17.084	33.5	51.3	79.5	102	128.9	157.8	186.13	275.4	305	336	379	411	444	511.96	546.58	1397.2	1504.6	1603	1735	1846	1962	2119	2219	9544.1	10012.1
28	Nickel	Ni		1.15716	7.6398	18.1688	35.19	54.9	76.06	108	133	162	193	224.6	321	352	384	430	464	499	571.08	607.06	1541	1648	1756	1894	2011	2131	2295	2399.2	10288.8	10775.4
29	Copper	Cu		1.23578	7.72638	20.2924	36.841	57.38	79.8	103	139	166	199	232	265.3	369	401	435	484	520	557	633	670.588	1697	1804	1916	2060	2182	2308	2478	2587.5	11062.4	11567.6
30	Zinc	Zn		0	9.3942	17.9644	39.723	59.4	82.6	108	134	174	203	238	274	310.8	419.7	454	490	542	579	619	698	738	1856	1961	2085	2214	2358	2491.5	2669.9	2782	11864.9	12388.9
31	Gallium	Ga		0.43	5.9993	20.5151	30.71	64	86.01	112.7	140.8	170	211	244	280	319	356	471.2	508.82	548.31	599.8	640	677	765.7	807.308	2010	2129	2258	2391	2543.9	2683	2868	2984.43	12696.6	13239.5
32	Germanium	Ge		1.23271	7.89943	15.9346	34.2241	45.7131	93.5	115.9	144.9	176.4	212.5	252.1	286	326	367	407	527.9	567.29	609.06	662.8	710	744	837.1	880.444	2180.1	2304	2439	2575	2737.2	2881.9	3074	3194.29	13557.4	14119.4
33	Arsenic	As		0.8048	9.7886	18.5892	28.351	50.13	62.63	127.6	147	180	213	247	296	333	375	418	460	587.6	628.82	672.9	728.9	774	814	911.7	956.791	2357	2486	2626	2766	2938	3088.1	3287	3411.64	14447.7	15028.9
34	Selenium	Se		2.0206	9.75239	21.19	30.8204	42.945	68.3	81.7	155.4	184	219	255	291	342.9	383	426	473	517	650.5	693.38	739.8	798	845.8	887	989.6	1036.36	2540.7	2674	2820	2964	3146	3301.8	3507	3636.53	15367.5	15968.1
35	Bromine	Br		3.36359	11.8138	21.591	36	47.3	59.7	88.6	103	192.8	224	261	301	338	393	436	481	530	577	716.3	760.99	809.8	870	920.8	963	1070.6	1119.17	2731	2870	3020	3169	3361	3523.1	3735	3868.99	16317	16937.1
36	Krypton	Kr		0	13.9996	24.3598	36.95	52.5	64.7	78.5	111	125.802	230.85	268.2	308	350	391	447	492	541	592	641	786	833	884	937	998	1051	1151	1205.3	2928	3070	3227	3381	3584	3752	3971	4109.08	17296.4	17936.2
37	Rubidium	Rb		0.485916	4.17713	27.2895	40	52.6	71	84.4	99.2	136	150	277.1	313.1	356	400	443	502	550	601	654	706	857	905.3	958.9	1024	1080	1125	1242.5	1294.57	3133.3	3281	3442	3600	3815	3988	4214	4356.86	18305.9	18965.5
38	Strontium	Sr		0.05206	5.69485	11.0301	42.89	57	71.6	90.8	106	122.3	162	177	324.1	362	408	454	499	562	612	665	722	774	932	982.1	1038	1105	1165	1211	1333.4	1387.19	3344.7	3497	3664	3830	4053	4232	4465	4612.4	19345.6	20025.2
39	Yttrium	Y		0.307	6.2173	12.224	20.52	60.597	77	93	116	129	146.2	191	206	374	414	463	512	559	624	677	733	790	847	1010	1061.9	1120.2	1190	1253	1300	1427.6	1483.12	3562.9	3720	3892	4060	4299	4484	4724	4875.73	20415.7	21115.5
40	Zirconium	Zr		0.427	6.6339	13.1	22.99	34.34	80.348	96.27	112	133.7	153	172.02	214.9	236.25	426	470	520	573	622	690	745	803	863	922	1092	1144.7	1205.4	1277	1344	1392	1525.1	1582.37	3788	3950	4127	4300	4553	4744	4991	5146.94	21516.5	22236.7
41	Niobium	Nb		0.894	6.75885	14	25.04	38.3	50.55	102.057	125	136	159.2	180	200.28	246.1	268.59	482.5	530	581	636	688	758	816	877	940	1000	1176	1230.6	1293.7	1368	1439	1500	1625.9	1684.97	4020.1	4187	4369	4540	4815	5011	5265	5426.06	22648	23388.8
42	Molybdenum	Mo		0.7473	7.09243	16.16	27.13	46.4	54.49	68.8276	125.664	143.6	164.12	186.4	209.3	230.28	279.1	302.6	544	570	636	702	767	833	902	968	1020	1082	1263	1323	1387	1449	1535	1601	1730.1	1790.93	4259	4430	4618	4800	5084	5287	5548	5713.19	23810.7	24572.2
43	Technetium	Tc		0.55	7.28	15.26	29.54	41	57	72	88	150	169	189.9	214	239	262.08	311	338.55	604	655	713	773	829	904	968	1032	1102	1166	1354	1411.6	1479.5	1559	1638	1689	1838	1900.28	4505	4681	4874	5060	5361	5570	5838	6008.39	25004.5	25787
44	Ruthenium	Ru		1.076	7.3605	16.76	28.47	45	59	76	93	110	178.4	198	219.9	245	271	295.9	348	376.25	670	723	784	845	905	981	1048	1115	1187	1253	1447	1506.7	1577	1659	1743	1794	1949	2013.04	4758	4939	5136	5330	5647	5862	6137	6311.72	26229.9	27033.5
45	Rhodium	Rh		1.14289	7.4589	18.08	31.06	42	63	80	97	115.1	135	207.51	228	252.1	277	306	331.58	389	416	739	794	857	921	984	1061	1131	1202	1274	1344	1544	1604.9	1677.6	1763	1851	1903	2063	2129.22	5018	5203	5406	5600	5940	6161	6444	6623.26	27487	28312
46	Palladium	Pd		0.56214	8.3369	19.43	32.93	46	61	84.1	101	120	141	160	238.57	260	286	311	342	369.1	427	458	810	869	933	1000	1065	1145	1218	1290	1366	1438	1644	1706.2	1781.3	1869	1962	2016	2181	2248.87	5284	5475	5683	5880	6242	6469	6759	6943.1	28776
47	Silver	Ag		1.30447	7.57623	21.4775	34.83	49	65	82	106	125	145	167	188	271.46	294	321	347	381	408.43	469	500.87	885	946	1013	1082	1149	1231	1308	1382	1460	1535	1747	1810.5	1888	1979	2077	2131	2302	2371.99	5558	5753	5966	6170	6551	6784	7082	7271.3
48	Cadmium	Cd		0	8.99382	16.9083	37.48	51	67.9	87	105	130.1	150	173	195	218	305	329	358	385	421	452.55	513	546.19	963	1026	1095	1167	1237	1320	1400	1477	1558	1635	1852	1917.9	1997.9	2091	2195	2250	2427	2498.61	5839	6039	6257	6460	6870	7109	7414
49	Indium	In		0.38392	5.78636	18.8703	28.03	54	69.3	90	109	130.1	156	178	201	226	249	341	368	396	425	462	497.11	560	593.38	1043	1109	1181	1255	1328	1413	1496	1575	1659	1738	1961	2028.5	2111	2207	2317	2373	2555	2628.77	6126	6331	6554	6770	7196	7442
50	Tin	Sn		1.11207	7.34392	14.6322	30.5026	40.735	72.28	94	112.9	135	156	184	208	232	258	282	379	407	437	466	506	537	608	642.35	1127	1195	1269	1347	1421	1508	1596	1676	1763	1844	2074	2142.1	2227	2326	2443	2499	2687	2762.5	6421	6631	6859	7080	7531
51	Antimony	Sb		1.0474	8.60839	16.63	25.3	44.2	56	108	117	139	162	185	214	238	265	292	317	420	447	479	510	552	584	657	693.26	1214	1285	1360	1441	1518	1606	1698	1781	1869	1954	2190	2266	2349	2428	2567	2654	2815	2900	6714	6929	7167	7390
52	Tellurium	Te		1.97088	9.0096	18.6	27.96	37.41	58.75	70.7	137	143	167	191.1	215	245	272	299	328	354	461	491	522	555	599	633	709	746.12	1304	1377	1455	1538	1618	1707	1803	1889	1979	2066	2309	2386	2472	2552	2700	2788	2954	3041	7022	7243	7485
53	Iodine	I		3.05905	10.4513	19.1313	33	40.36	51.517	74.37	87.61	150.81	171	197	220.9	247	279	307	335	365	393	505	535	569	601	649	683	762	800.76	1397	1472	1553	1639	1720	1812	1911	1999	2093	2181	2431	2510	2598	2680	2836	2930	3096	3185.5	7337	7600
54	Xenon	Xe		0	12.1298	20.975	32.123	42.2	54.14	66.703	91.6	105.978	179.84	202	229.02	255	281	314	343	374	404	430	549	582	616	650	700	736	818	857.03	1493	1571	1653	1742	1826	1919	2023	2113	2209	2300	2556	2637	2726	2811	2975	3068	3243	3333.8	7660
55	Cesium	Cs		0.47164	3.89391	23.1574	33.195	43	56	69.1	82.9	110.09	125.61	213.3	233	261	289	316	352	382	413	445	476	597	629	666	700	753	791	875	916.07	1592	1672	1757	1848	1936	2029	2137	2230	2329	2422	2683	2767	2859	2945	3118	3214	3392	3485
56	Barium	Ba		0.14462	5.21166	10.0038	35.84	47.03	58	71	86	101	130.53	146.52	241	267.1	296	325	354	390	422	455	488	520	646	679	717	752	809	846	935	976.6	1695	1776	1864	1958	2047	2142	2256	2349	2452	2547	2814	2901	2994	3081	3266	3363	3550
57	Lanthanum	La		0.47	5.5769	11.059	19.1773	49.95	61.6	74	88	105	119	151.42	168.77	275	303	332	364	393	431	464	498	533	566	696	731	770	806	865	906	995	1039.09	1800	1884	1974	2069	2162	2259	2377	2473	2577	2674	2950	3036	3133	3222	3416	3515
58	Cerium	Ce		0.628	5.5387	10.85	20.198	36.758	65.55	77.6	91	106	125	140	172	192.24	312	340	371	403	435	472	509	543	579	613	749	785	824	862	924	965	1060	1103.53	1908	1994	2087	2185	2280	2378	2500	2600	2706	2806	3087	3176	3274	3366	3570
59	Praseodymium	Pr		0.962	5.473	10.55	21.624	38.98	57.53	82	97	112	131	148	162	196	217.02	350	378	412	445	478	516	554	590	627	663	803	840	880	920	985	1028	1124	1169.94	2019	2108	2202	2304	2400	2501	2628	2729	2838	2941	3227	3319	3419	3512
60	Neodymium	Nd		0.162	5.525	10.72	22.1	40.4	60	84	99	114	136	152	168	195	221	243	389	420	453	489	522	562	602	638	678	714	859	896	939	978	1049	1092	1191	1238.42	2134	2224	2321	2425	2525	2627	2758	2861	2974	3078	3371	3465	3567
61	Promethium	Pm		0.129	5.582	10.9	22.3	41.1	61.69	85	101	116	138	155	174	202	229	248	269	430	462	497	534	569	609	651	689	730	767	916	956	998	1040	1113	1158	1261	1308.7	2251	2344	2443	2549	2652	2755	2892	2997	3110	3219	3519	3613
62	Samarium	Sm		0.162	5.6437	11.07	23.4	41.4	62.66	90	103	118	141	158	179	208	237	257	276	306.5	474	506	543	581	617	658	702	742	782	822	976	1016	1060	1103	1180	1226	1332	1381.6	2371	2466	2569	2676	2782	2887	3028	3137	3253	3363	3669
63	Europium	Eu		0.116	5.67038	11.25	24.92	42.7	63	88	105	120	144	161	183	213	243	263	281	311	344.4	518	553	590	630	667	709	755	795	838	879	1037	1078	1124	1167	1249	1296	1406	1456.06	2495	2591	2697	2807	2914	3022	3168	3279	3398	3510
64	Gadolinium	Gd		0.137	6.1498	12.09	20.63	44	64.76	89	106	123	144	165	183	213	246	268	288	319	352	380	565	601	639	680	719	761	810	851	895	937	1100	1142	1189	1233	1321	1368	1481	1532.35	2621	2720	2827	2941	3050	3160	3312	3424	3550
65	Terbium	Tb		0.436	5.8638	11.52	21.91	39.79	66.5	90	108	125	143	168	186	216	250	270	294	325	358	393	426.6	613	651	690	732	772	816	866	909	954	997	1165	1208	1256	1301	1393	1443	1559	1610.38	2750	2852	2961	3078	3189	3300	3458	3573
66	Dysprosium	Dy		0.352	5.9389	11.67	22.8	41.47	62.08	93	110	127	152	170	192	224	259	279	300	332	366	399	431	465	664	702	743	786	827	872	924	969	1014	1059	1232	1275	1325	1371	1468	1520	1638	1691.74	2882	2987	3098	3217	3331	3445	3607
67	Holmium	Ho		0.338	6.0215	11.8	22.84	42.5	63.93	95	112	129	155	174	196	229	263	284	305	340	373	408	441	475	510	715	755	797	842	885	929	985	1029	1077	1122	1300	1346	1395	1443	1545	1598	1719	1773.57	3018	3125	3238	3359	3476	3592
68	Erbium	Er		0.312	6.1077	11.93	22.74	42.7	65.1	96	114	131	158	177	201	235	268	290	311	345	381	415	450	486	520	555	770	810	853	899	943	989	1046	1092	1142	1188	1370	1416	1468	1516	1625	1678	1803	1859	3157	3265	3381	3505	3624
69	Thulium	Tm		0.016	6.18431	12.05	23.68	42.7	65.43	98	116	133	160	180	205	239	274	295	317	352	387	424	460	500	530	570	603	825	866	911	958	1004	1050	1110	1157	1207	1255	1442	1490	1542	1591	1706	1761	1889	1945.2	3300	3409	3528	3653
70	Ytterbium	Yb		0	6.25416	12.176	25.05	43.56	65.58	99	117	135	163	182	209	244	279	301	324	360	396	431	469	505	540	580	620	651	882	924	971	1019	1065	1114	1175	1224	1275	1324	1516	1564	1618	1668	1789	1845	1978	2036.4	3443	3555	3677
71	Lutetium	Lu		0.34	5.42586	13.9	20.9594	45.25	66.8	98	117	136	159	185	205	238	276	305	328	361	399	438	476	520	560	600	640	670	713	941	985	1032	1081	1130	1178	1242	1292	1345	1395	1591	1641	1696	1747	1875	1933	2067	2125.5	3590	3706
72	Hafnium	Hf		0.114	6.82507	15	23.3	33.33	68.375	98	118	138	157	187	209	230	270	310	334	359	399	440	481	520	560	610	650	690	730	772	1002	1047	1094	1146	1195	1245	1311	1362	1417	1467	1669	1719	1776	1827	1963	2022	2159	2218.9	3741
73	Tantalum	Ta		0.323	7.54957	16.2	23.1	35	48.272	94.011	119	139	159	180	213	235	262	304	338	363	396	439	482	530	570	620	660	700	740	790	832	1064	1110	1160	1211	1262	1313	1382	1434	1490	1542	1748	1799	1857	1910	2053	2113	2254	2314.7
74	Tungsten	W		0.81626	7.86403	16.1	26.02	38.21	51.59	64.766	122.01	141.2	160.2	179	208.9	231.6	258.3	290.7	325.3	361.9	387.9	420.7	462.1	502.6	543.4	594.5	640.6	686	734.1	784.4	833.4	881.4	1132.2	1180	1230.4	1283.4	1335.1	1386.8	1459.9	1512.4	1569.1	1622	1829.8	1882.9	1940.6	1994.8	2149.1	2210	2354
75	Rhenium	Re		0.15	7.83352	16.6	27	39.1	51.9	67	82.71	144.4	165	187	208	236	268	291	330	377	403	429	476	520	570	620	670	720	760	810	860	910	953	1194	1242	1294	1349	1402	1454	1530	1583	1641	1696	1912	1966	2025	2080	2240	2302
76	Osmium	Os		1.0778	8.43823	17	25	41	55	70.1	85.1	102.024	168.7	190	213	235	269	300	320	367	410	436	470	520	570	620	670	720	770	820	870	920	970	1015	1262	1311	1364	1420	1474	1528	1606	1660	1720	1776	1996	2052	2112	2168	2336
77	Iridium	Ir		1.56436	8.96702	17	28	40	57	72	89	105	123	194.8	217	240	264	303	329	356	407	445	472	510	560	610	670	720	770	820	870	920	980	1030	1080	1331	1381	1436	1493	1548	1603	1684	1739	1801	1857	2083	2139	2201	2258
78	Platinum	Pt		2.1251	8.9588	18.563	29	43	56	75	91	109	126	144.9	220.4	245	269	293	332	358	392	445	479	507	550	610	660	710	760	820	870	930	980	1040	1090	1140	1402	1454	1509	1567	1624	1680	1763	1821	1883	1941	2171	2228	2291
79	Gold	Au		2.30861	9.22553	20.2	30	45	60	74	94	112	130.1	149	168.2	200	275	299	324	365	392	433	487	520	550	600	650	710	760	820	870	930	990	1040	1100	1150	1210	1475	1527	1584	1644	1702	1758	1845	1904	1967	2026	2261	2320
80	Mercury	Hg		0	10.4375	18.7568	34.2	48.55	61.2	76.6	93	113.9	134	153	173	192.7	276.9	307	332	357	402	429	477	530	560	590	650	710	760	820	880	930	990	1050	1110	1160	1220	1280	1549	1603	1661	1723	1780	1839	1928	1989	2052	2113	2354
81	Thallium	Tl		0.377	6.10819	20.4283	29.83	51.14	62.6	80	98	116	135	158	177	198	218.3	306.9	340	366	392	439	467	520	570	600	640	700	760	820	880	930	990	1060	1110	1170	1230	1290	1350	1625	1681	1740	1802	1862	1920	2014	2075	2140	2202
82	Lead	Pb		0.364	7.41663	15.0325	31.9373	42.32	68.8	82.9	100.1	120	138	158	182	203	224	245.1	338.1	374	401	428	478	507	570	610	650	690	750	810	870	930	990	1050	1120	1180	1240	1300	1360	1430	1704	1760	1819	1884	1945	2004	2101	2163	2230
83	Bismuth	Bi		0.942362	7.2855	16.703	25.56	45.3	56	88.3	103	122	143	161.1	183	208	229	252	272.6	370.2	409	436	464	520	550	620	660	690	750	810	870	930	990	1060	1120	1180	1250	1310	1380	1440	1500	1784	1840	1902	1967	2029	2090	2190	2253
84	Polonium	Po		1.9	8.414	19.3	27	36	57	69.1	108	125	146.1	166	190	209	235	257	281	304	416	444	473	502	560	590	670	700	740	800	860	930	990	1060	1120	1180	1250	1320	1380	1440	1510	1570	1865	1923	1986	2052	2115	2177	2281
85	Astatine	At		2.8	9.31751	17.88	26.58	39.65	50.39	72	85.1	130.1	149	169	192.1	212	236	263	287	311	335	452	481	510	540	600	630	720	750	790	860	920	990	1050	1120	1180	1250	1320	1380	1450	1510	1590	1650	1948	2007	2071	2139	2203	2266
86	Radon	Rn		0	10.7485	21.4	29.4	36.9	52.9	64	88	102	154	173.9	195	218	240	264	293	317	342	367	488	519	549	579	643	680	760	800	850	920	980	1050	1120	1180	1250	1310	1390	1460	1520	1590	1660	1720	2033	2094	2158	2227	2293
87	Francium	Fr		0.486	4.07274	22.4	33	39.1	50	67	80	106	120	179	200	222.1	245	269	293	324	349	375	400	530	560	590	620	690	720	820	850	910	980	1040	1110	1180	1250	1320	1380	1460	1530	1600	1670	1740	1810	2119	2182	2247	2317
88	Radium	Ra		0.1	5.27842	10.1471	31	41	52.9	64	82	97	124	140	204.9	227	250	274	299	324	356	382	409	435	570	600	630	660	740	770	860	900	970	1040	1110	1180	1250	1320	1390	1460	1530	1610	1680	1750	1820	1880	2208	2271	2338
89	Actinium	Ac		0.35	5.17	11.75	17.431	44.8	55	67	79	98.9	113.9	143.9	161.1	233	255	279	305	330	355	390	416	444	470	610	640	670	710	780	820	920	950	1030	1100	1170	1240	1310	1380	1460	1530	1610	1680	1750	1820	1900	1970	2298	2362
90	Thorium	Th		0.368	6.3067	11.9	20	28.8	58	69.1	82	95	118	133	165	181	262	285	310	336	362	389	424	451	480	508	650	680	720	750	830	900	970	1010	1090	1160	1240	1310	1380	1460	1530	1600	1680	1760	1830	1910	2000	2060	2390
91	Protactinium	Pa		0.384	5.89	11.9	19	30.9	44.3	72	85.1	98.9	111	137	153	187	203	292	316	342	369	395	423	460	488	518	546	690	720	760	790	880	920	1020	1060	1150	1220	1300	1370	1450	1520	1600	1670	1760	1830	1910	2000	2060	2130
92	Uranium	U		0.373	6.1941	10.6	19.8	36.7	46	60	89	101	116	129	158	173	210	227	323	348	375	402	431	458	497	525	557	585	730	770	800	840	930	970	1070	1110	1210	1290	1360	1440	1520	1590	1670	1750	1830	1910	1990	2070	2140
93	Neptunium	Np		0.313	6.2657	11.5	19.7	33.8	48	65	92	107	121	136	151	179	196	233	252	355	382	408	438	466	495	535	565	596	626	770	810	850	880	980	1020	1130	1170	1280	1360	1430	1510	1590	1670	1740	1820	1910	1990	2070	2140
94	Plutonium	Pu		0.085	6.026	11.2	21	35	49	80	95	109	124	139	159	179	200	219	258	278	389	416	444	474	503	532	575	605	637	668	820	850	890	930	1030	1070	1180	1220	1340	1420	1500	1580	1660	1740	1820	1890	1990	2070	2150
95	Americium	Am		0.076	5.9738	11.7	21.7	36.8	50	67.9	95	110	126	141	162	184	206	225	242	284	305	424	451	481	511	541	571	616	646	680	711	860	900	940	980	1090	1130	1240	1280	1410	1490	1570	1650	1740	1820	1900	1980	2070	2160
96	Curium	Cm		0.321	5.9914	10	20.1	37.7	51	69.1	97	112	128	144	167	190	212	235	253	272	311	332	460	489	518	550	580	611	657	689	723	755	910	950	990	1030	1140	1180	1300	1340	1480	1560	1640	1730	1810	1890	1980	2060	2160
97	Berkelium	Bk		0.031	6.1979	11.9	21.6	36	56	70.1	90	114	130	147	171	195	218	240	259	279	303	339	361	497	526	557	590	621	652	700	733	768	800	960	1000	1040	1080	1200	1240	1360	1410	1550	1630	1720	1800	1890	1970	2050	2140
98	Californium	Cf		0.018	6.2817	11.8	22.4	37.7	51.9	75	91	112.9	133	152	178	202	225	247	265	286	310	334	368	390	536	566	597	630	662	695	744	778	814	847	1010	1050	1090	1120	1250	1300	1420	1460	1620	1700	1790	1880	1960	2050	2130
99	Einsteinium	Es		0.002	6.42	12	22.7	38.8	54.1	71	97	112.9	137	157	180	206	231	252	270	294	317	342	367	398	421	576	606	638	672	705	738	790	824	861	895	1060	1100	1140	1180	1310	1360	1480	1530	1690	1780	1870	1950	2040	2130
100	Fermium	Fm		0	6.5	10	23.2	39.3	55	74	93	120	136	162	185	209	237	257	276	300	326	351	377	402	430	453	616	647	680	716	749	782	837	871	909	944	1110	1150	1190	1230	1370	1420	1550	1600	1770	1860	1940	2030	2120
101	Mendelevium	Md		0	6.58	10	24.3	40	54.1	76	96	115.1	143.9	162	187	215	240	260	282	307	334	360	386	412	438	462	486	659	690	723	760	794	828	885	920	958	994	1160	1200	1250	1290	1430	1480	1620	1660	1840	1930	2020	2110
102	Nobelium	No		0	6.65	12.5	25.8	41.5	60	74	97	119	140	170	187	216	246	267	290	312	341	367	394	420	448	475	496	520	701	734	768	805	840	875	934	969	1010	1045	1220	1260	1300	1340	1500	1550	1680	1730	1920	2010	2110
103	Lawrencium	Lr		0.465	5.35422	14.3	21.4	43.6	56	80	96	121	143	165	197	216	244	269	290	320	344	374	403	431	460	487	510	540	560	745	779	814	852	888	922	985	1020	1061	1098	1280	1320	1360	1410	1570	1620	1760	1810	2010	2100
							Chemical Potentials of Atoms and Atomic Ions (eV) from the Parr-Pearson-Mulliken formula
											Charge
Atomic #	Element	Symbol	-2	-1	0	1	2	3	4	5	6	7	8	9	10	11	12	13	14	15	16	17	18	19	20	21	22	23	24	25	26	27	28	29	30	31	32	33	34	35	36	37	38	39	40	41	42	43	44
1	Hydrogen	H	-2.28	-2.46	-7.18	-56
2	Helium	He	-	0.38	-12.29	-39.5026	-90
3	Lithium	Li	1.72	-0.69	-3	-40.5159	-99.0471
4	Beryllium	Be	4.36	1.7	-4.66	-13.7669	-86.0539	-185.808
5	Boron	B	5.62	2.08	-4.29	-16.7264	-31.5427	-148.653	-299.801
6	Carbon	C	8.41	2.08	-6.26	-17.8218	-36.1355	-56.1908	-228.29	-441.04
7	Nitrogen	N	9.95	3.4	-7.27	-22.0677	-38.5253	-62.4614	-87.6818	-324.981	-609.559
8	Oxygen	O	3.87	2.79	-7.54	-24.3696	-45.0283	-66.1745	-95.6563	-126.009	-438.705	-805.35
9	Fluorine	F	3.7	-1.91	-10.41	-26.1968	-48.8396	-74.9241	-100.691	-135.704	-171.176	-569.549	-1028.51
10	Neon	Ne	2.77	1.44	-10.78	-31.2638	-52.2065	-80.285	-111.665	-142.07	-182.603	-223.187	-717.464	-1279.01
11	Sodium	Na	4.51	0.41	-2.84	-26.2127	-59.4532	-85.265	-118.655	-155.29	-190.34	-236.375	-282.057	-882.493	-1556.91
12	Magnesium	Mg	5.58	1.88	-3.82	-11.3408	-47.5895	-94.7046	-125.268	-164.015	-205.89	-245.49	-297.01	-347.78	-1064.65	-1862.24
13	Aluminum	Al	6.44	1.69	-3.21	-12.4072	-23.6381	-74.2198	-136.909	-172.157	-216.125	-263.21	-307.395	-364.44	-420.375	-1263.99	-2195.06
14	Silicon	Si	7.97	1.59	-4.77	-12.2488	-24.9194	-39.3174	-105.954	-186.019	-225.885	-275.02	-327.33	-376.245	-438.865	-499.89	-1480.53	-2555.41
15	Phosphorus	P	8.44	2.01	-5.62	-15.1281	-24.9861	-40.8233	-58.2345	-142.723	-241.995	-286.585	-340.865	-398.265	-451.93	-520.13	-586.27	-1714.32	-2943.38
16	Sulfur	S	3.59	1.28	-6.22	-16.8489	-29.0639	-41.006	-59.9082	-80.3237	-184.5	-304.849	-354.15	-413.525	-476.15	-534.62	-608.32	-679.605	-1965.39	-3358.98
17	Chlorine	Cl	2.51	-1.82	-8.29	-18.3906	-31.7118	-46.5376	-60.6326	-82.415	-105.613	-231.238	-374.17	-427.845	-492.455	-560.635	-624.35	-703.235	-779.58	-2233.96	-3802.41
18	Argon	Ar	-0.11	-0.65	-7.88	-21.6946	-34.1848	-50.275	-67.415	-83.0145	-107.666	-133.892	-282.955	-450.57	-508.825	-578.61	-652.18	-720.92	-805.255	-886.4	-2519.46	-4273.56
19	Potassium	K	0.49	-1.47	-2.42	-17.9853	-38.718	-53.358	-71.785	-91.03	-108.48	-136.22	-165.349	-339.809	-534.25	-597.05	-672	-750.6	-823.85	-914.55	-1000.7	-2822.1	-4772.42
20	Calcium	Ca	0.39	-2.48	-3.07	-8.99244	-31.3924	-59.0915	-75.885	-96.64	-117.99	-137.22	-167.89	-199.907	-401.587	-624.55	-691.9	-772.1	-856.05	-934.25	-1030.5	-1122.4	-3143.3	-5299.33
21	Scandium	Sc	-	0.81	-3.38	-9.68063	-18.7782	-49.123	-82.5697	-101.165	-124.34	-148.05	-169.065	-202.605	-237.489	-468.579	-722.03	-793.75	-879.15	-968.25	-1051.5	-1153.5	-1250.49	-3481.39	-5854.26
22	Titanium	Ti	-0.39	-1.12	-3.45	-10.2018	-20.5336	-35.3795	-71.2836	-109.415	-130.165	-155.6	-181.25	-204.01	-240.495	-278.285	-539.67	-825.47	-902.5	-992.95	-1087.5	-1176	-1283.5	-1385.7	-3837.2	-6437.41
23	Vanadium	V	-	-1.08	-3.64	-10.6821	-21.9645	-38.01	-55.9954	-96.7058	-139.365	-162	-189.6	-218.15	-243.1	-281.9	-322.188	-616.139	-936	-1018	-1114	-1214	-1307.5	-1420.5	-1527.8	-4210.45	-7048.71
24	Chromium	Cr	-1.64	-2.3	-3.72	-11.6261	-23.7229	-40.06	-59.31	-80.0474	-125.407	-172.44	-197	-226.85	-257.6	-284.4	-326.4	-369.484	-697.384	-1053.8	-1141	-1242	-1347.5	-1446	-1565	-1677.7	-4601.55	-7688.26
25	Manganese	Mn	-0.24	-2.53	-3.72	-11.537	-24.654	-42.434	-61.8	-84	-107.401	-156.851	-208.15	-235.05	-267.15	-300.2	-329	-373.3	-419.082	-784.932	-1179.35	-1270.5	-1377	-1488	-1591.5	-1716	-1833.95	-5010.25	-8356.27
26	Iron	Fe	2.4	-4	-4.03	-12.045	-23.4199	-42.726	-64.9	-87.05	-112.04	-138.02	-192.33	-247.85	-276.15	-310.5	-345.9	-376.6	-424.6	-473.128	-877.628	-1312	-1407	-1519	-1635.5	-1744	-1874.5	-1986.5	-5425.5	-9052.85
27	Cobalt	Co	6.73	-0.72	-4.27	-12.4825	-25.292	-42.4	-65.4	-90.75	-115.45	-143.35	-171.965	-230.765	-290.2	-320.5	-357.5	-395	-427.5	-477.98	-529.27	-971.89	-1450.9	-1553.8	-1669	-1790.5	-1904	-2040.5	-2169	-5881.55	-9778.11
28	Nickel	Ni	4.8	1.68	-4.4	-12.9043	-26.6794	-45.045	-65.48	-92.03	-120.5	-147.5	-177.5	-208.8	-272.8	-336.5	-368	-407	-447	-481.5	-535.04	-589.07	-1074.03	-1594.5	-1702	-1825	-1952.5	-2071	-2213	-2347.1	-6344	-10532.1
29	Copper	Cu	6.88	0.18	-4.48	-14.0094	-28.5667	-47.1105	-68.59	-91.4	-121	-152.5	-182.5	-215.5	-248.65	-317.15	-385	-418	-459.5	-502	-538.5	-595	-651.794	-1183.79	-1750.5	-1860	-1988	-2121	-2245	-2393	-2532.75	-6824.94	-11315
30	Zinc	Zn	6.88	2.65	-4.7	-13.6793	-28.8437	-49.5615	-71	-95.3	-121	-154	-188.5	-220.5	-256	-292.4	-365.25	-436.85	-472	-516	-560.5	-599	-658.5	-718	-1297	-1908.5	-2023	-2149.5	-2286	-2424.75	-2580.7	-2725.95	-7323.47	-12126.9
31	Gallium	Ga	8.03	2.07	-3.21	-13.2572	-25.6126	-47.355	-75.005	-99.355	-126.75	-155.4	-190.5	-227.5	-262	-299.5	-337.5	-413.6	-490.01	-528.565	-574.055	-619.9	-658.5	-721.35	-786.504	-1408.65	-2069.5	-2193.5	-2324.5	-2467.45	-2613.45	-2775.5	-2926.21	-7840.49	-12968
32	Germanium	Ge	8.76	0.97	-4.57	-11.917	-25.0794	-39.9686	-69.6065	-104.7	-130.4	-160.65	-194.45	-232.3	-269.05	-306	-346.5	-387	-467.45	-547.595	-588.175	-635.93	-686.4	-727	-790.55	-858.772	-1530.27	-2242.05	-2371.5	-2507	-2656.1	-2809.55	-2977.95	-3134.15	-8375.86	-13838.4
33	Arsenic	As	9.18	1.87	-5.3	-14.1889	-23.4701	-39.2405	-56.38	-95.115	-137.3	-163.5	-196.5	-230	-271.5	-314.5	-354	-396.5	-439	-523.8	-608.21	-650.86	-700.9	-751.45	-794	-862.85	-934.245	-1656.9	-2421.5	-2556	-2696	-2852	-3013.05	-3187.55	-3349.32	-8929.66	-14738.3
34	Selenium	Se	3.68	0.7	-5.88	-15.4712	-26.0052	-36.8827	-55.6225	-75	-118.55	-169.7	-201.5	-237	-273	-316.95	-362.95	-404.5	-449.5	-495	-583.75	-671.94	-716.59	-768.9	-821.9	-866.4	-938.3	-1012.98	-1788.53	-2607.35	-2747	-2892	-3055	-3223.9	-3404.4	-3571.76	-9502.01	-15667.8
35	Bromine	Br	4.26	-0.88	-7.59	-16.7024	-28.7955	-41.65	-53.5	-74.15	-95.8	-147.9	-208.4	-242.5	-281	-319.5	-365.5	-414.5	-458.5	-505.5	-553.5	-646.65	-738.645	-785.395	-839.9	-895.4	-941.9	-1016.8	-1094.88	-1925.08	-2800.5	-2945	-3094.5	-3265	-3442.05	-3629.05	-3801.99	-10093	-16627.1
36	Krypton	Kr	2.41	0.47	-7	-19.1797	-30.6549	-44.725	-58.6	-71.6	-94.75	-118.401	-178.326	-249.525	-288.1	-329	-370.5	-419	-469.5	-516.5	-566.5	-616.5	-713.5	-809.5	-858.5	-910.5	-967.5	-1024.5	-1101	-1178.15	-2066.65	-2999	-3148.5	-3304	-3482.5	-3668	-3861.5	-4040.04	-10702.8	-17616.3
37	Rubidium	Rb	0.43	-0.37	-2.33	-15.7333	-33.6448	-46.3	-61.8	-77.7	-91.8	-117.6	-143	-213.55	-295.1	-334.55	-378	-421.5	-472.5	-526	-575.5	-627.5	-680	-781.5	-881.15	-932.1	-991.45	-1052	-1102.5	-1183.75	-1268.53	-2213.93	-3207.15	-3361.5	-3521	-3707.5	-3901.5	-4101	-4285.43	-11331.4	-18635.7
38	Strontium	Sr	0.56	-2.34	-2.88	-8.36247	-26.96	-49.945	-64.3	-81.2	-98.4	-114.15	-142.15	-169.5	-250.55	-343.05	-385	-431	-476.5	-530.5	-587	-638.5	-693.5	-748	-853	-957.05	-1010.05	-1071.5	-1135	-1188	-1272.2	-1360.3	-2365.94	-3420.85	-3580.5	-3747	-3941.5	-4142.5	-4348.5	-4538.7	-11979	-19685.4
39	Yttrium	Y	2.95	-1.46	-3.27	-9.22065	-16.372	-40.5585	-68.7985	-85	-104.5	-122.5	-137.6	-168.6	-198.5	-290	-394	-438.5	-487.5	-535.5	-591.5	-650.5	-705	-761.5	-818.5	-928.5	-1035.95	-1091.05	-1155.1	-1221.5	-1276.5	-1363.8	-1455.36	-2523.01	-3641.45	-3806	-3976	-4179.5	-4391.5	-4604	-4799.86	-12645.7	-20765.6
40	Zirconium	Zr	1.35	0.69	-3.53	-9.86695	-18.045	-28.665	-57.344	-88.309	-104.135	-122.85	-143.35	-162.51	-193.46	-225.575	-331.125	-448	-495	-546.5	-597.5	-656	-717.5	-774	-833	-892.5	-1007	-1118.35	-1175.05	-1241.2	-1310.5	-1368	-1458.55	-1553.74	-2685.19	-3869	-4038.5	-4213.5	-4426.5	-4648.5	-4867.5	-5068.97	-13331.7	-21876.6
41	Niobium	Nb	3.14	-0.76	-3.83	-10.3794	-19.52	-31.67	-44.425	-76.3035	-113.529	-130.5	-147.6	-169.6	-190.14	-223.19	-257.345	-375.545	-506.25	-555.5	-608.5	-662	-723	-787	-846.5	-908.5	-970	-1088	-1203.3	-1262.15	-1330.85	-1403.5	-1469.5	-1562.95	-1655.43	-2852.53	-4103.55	-4278	-4454.5	-4677.5	-4913	-5138	-5345.53	-14037.1	-23018.4
42	Molybdenum	Mo	3.98	-0.56	-3.92	-11.6262	-21.645	-36.765	-50.445	-61.6588	-97.2458	-134.632	-153.86	-175.26	-197.85	-219.79	-254.69	-290.85	-423.3	-557	-603	-669	-734.5	-800	-867.5	-935	-994	-1051	-1172.5	-1293	-1355	-1418	-1492	-1568	-1665.55	-1760.52	-3024.97	-4344.5	-4524	-4709	-4942	-5185.5	-5417.5	-5630.6	-14761.9	-24191.4
43	Technetium	Tc	6.7	-1.42	-3.91	-11.27	-22.4	-35.27	-49	-64.5	-80	-119	-159.5	-179.45	-201.95	-226.5	-250.54	-286.54	-324.775	-471.275	-629.5	-684	-743	-801	-866.5	-936	-1000	-1067	-1134	-1260	-1382.8	-1445.55	-1519.25	-1598.5	-1663.5	-1763.5	-1869.14	-3202.64	-4593	-4777.5	-4967	-5210.5	-5465.5	-5704	-5923.2	-15506.5	-25395.8
44	Ruthenium	Ru	15.66	0.17	-4.22	-12.0602	-22.615	-36.735	-52	-67.5	-84.5	-101.5	-144.2	-188.2	-208.95	-232.45	-258	-283.45	-321.95	-362.125	-523.125	-696.5	-753.5	-814.5	-875	-943	-1014.5	-1081.5	-1151	-1220	-1350	-1476.85	-1541.85	-1618	-1701	-1768.5	-1871.5	-1981.02	-3385.52	-4848.5	-5037.5	-5233	-5488.5	-5754.5	-5999.5	-6224.36	-16270.8	-26631.7
45	Rhodium	Rh	7.3	3.11	-4.3	-12.7694	-24.57	-36.53	-52.5	-71.5	-88.5	-106.05	-125.05	-171.255	-217.755	-240.05	-264.55	-291.5	-318.79	-360.29	-402.5	-577.5	-766.5	-825.5	-889	-952.5	-1022.5	-1096	-1166.5	-1238	-1309	-1444	-1574.45	-1641.25	-1720.3	-1807	-1877	-1983	-2096.11	-3573.61	-5110.5	-5304.5	-5503	-5770	-6050.5	-6302.5	-6533.63	-17055.1	-27899.5
46	Palladium	Pd	5.75	1.75	-4.44	-13.8834	-26.18	-39.465	-53.5	-72.55	-92.55	-110.5	-130.5	-150.5	-199.285	-249.285	-273	-298.5	-326.5	-355.55	-398.05	-442.5	-634	-839.5	-901	-966.5	-1032.5	-1105	-1181.5	-1254	-1328	-1402	-1541	-1675.1	-1743.75	-1825.15	-1915.5	-1989	-2098.5	-2214.93	-3766.43	-5379.5	-5579	-5781.5	-6061	-6355.5	-6614	-6851.05	-17859.6
47	Silver	Ag	7.54	0.43	-4.44	-14.5268	-28.1537	-41.915	-57	-73.5	-94	-115.5	-135	-156	-177.5	-229.73	-282.73	-307.5	-334	-364	-394.715	-438.715	-484.935	-692.935	-915.5	-979.5	-1047.5	-1115.5	-1190	-1269.5	-1345	-1421	-1497.5	-1641	-1778.75	-1849.25	-1933.5	-2028	-2104	-2216.5	-2336.99	-3964.99	-5655.5	-5859.5	-6068	-6360.5	-6667.5	-6933	-7176.65
48	Cadmium	Cd	8.34	2.44	-4.5	-12.9511	-27.1942	-44.24	-59.45	-77.45	-96	-117.55	-140.05	-161.5	-184	-206.5	-261.5	-317	-343.5	-371.5	-403	-436.775	-482.775	-529.595	-754.595	-994.5	-1060.5	-1131	-1202	-1278.5	-1360	-1438.5	-1517.5	-1596.5	-1743.5	-1884.95	-1957.9	-2044.45	-2143	-2222.5	-2338.5	-2462.81	-4168.81	-5939	-6148	-6358.5	-6665	-6989.5	-7261.5
49	Indium	In	10.25	0.65	-3.09	-12.3283	-23.4502	-41.015	-61.65	-79.65	-99.5	-119.55	-143.05	-167	-189.5	-213.5	-237.5	-295	-354.5	-382	-410.5	-443.5	-479.555	-528.555	-576.69	-818.19	-1076	-1145	-1218	-1291.5	-1370.5	-1454.5	-1535.5	-1617	-1698.5	-1849.5	-1994.75	-2069.75	-2159	-2262	-2345	-2464	-2591.89	-4377.39	-6228.5	-6442.5	-6662	-6983	-7319
50	Tin	Sn	9.03	1.69	-4.23	-10.9881	-22.5674	-35.6188	-56.5075	-83.14	-103.45	-123.95	-145.5	-170	-196	-220	-245	-270	-330.5	-393	-422	-451.5	-486	-521.5	-572.5	-625.175	-884.675	-1161	-1232	-1308	-1384	-1464.5	-1552	-1636	-1719.5	-1803.5	-1959	-2108.05	-2184.55	-2276.5	-2384.5	-2471	-2593	-2724.75	-4591.75	-6526	-6745	-6969.5	-7305.5
51	Antimony	Sb	8.35	2.01	-4.82	-12.6192	-20.965	-34.75	-50.1	-82	-112.5	-128	-150.5	-173.5	-199.5	-226	-251.5	-278.5	-304.5	-368.5	-433.5	-463	-494.5	-531	-568	-620.5	-675.13	-953.63	-1249.5	-1322.5	-1400.5	-1479.5	-1562	-1652	-1739.5	-1825	-1911.5	-2072	-2228	-2307.5	-2388.5	-2497.5	-2610.5	-2734.5	-2857.5	-4807	-6821.5	-7048	-7278.5
52	Tellurium	Te	6.69	0.95	-5.49	-13.8048	-23.28	-32.685	-48.08	-64.725	-103.85	-140	-155	-179.05	-203.05	-230	-258.5	-285.5	-313.5	-341	-407.5	-476	-506.5	-538.5	-577	-616	-671	-727.56	-1025.06	-1340.5	-1416	-1496.5	-1578	-1662.5	-1755	-1846	-1934	-2022.5	-2187.5	-2347.5	-2429	-2512	-2626	-2744	-2871	-2997.5	-5031.5	-7132.5	-7364
53	Iodine	I	8.35	-1.62	-6.75	-14.7913	-26.0656	-36.68	-45.9385	-62.9435	-80.99	-119.21	-160.905	-184	-208.95	-233.95	-263	-293	-321	-350	-379	-449	-520	-552	-585	-625	-666	-722.5	-781.38	-1098.88	-1434.5	-1512.5	-1596	-1679.5	-1766	-1861.5	-1955	-2046	-2137	-2306	-2470.5	-2554	-2639	-2758	-2883	-3013	-3140.75	-5261.25	-7468.5
54	Xenon	Xe	7.86	-1.47	-6.07	-16.5524	-26.549	-37.1615	-48.17	-60.4215	-79.1515	-98.7889	-142.909	-190.92	-215.51	-242.01	-268	-297.5	-328.5	-358.5	-389	-417	-489.5	-565.5	-599	-633	-675	-718	-777	-837.515	-1175.01	-1532	-1612	-1697.5	-1784	-1872.5	-1971	-2068	-2161	-2254.5	-2428	-2596.5	-2681.5	-2768.5	-2893	-3021.5	-3155.5	-3288.4	-5496.9
55	Cesium	Cs	2.34	-2.04	-2.18	-13.5257	-28.1762	-38.0975	-49.5	-62.55	-76	-96.495	-117.85	-169.455	-223.15	-247	-275	-302.5	-334	-367	-397.5	-429	-460.5	-536.5	-613	-647.5	-683	-726.5	-772	-833	-895.535	-1254.04	-1632	-1714.5	-1802.5	-1892	-1982.5	-2083	-2183.5	-2279.5	-2375.5	-2552.5	-2725	-2813	-2902	-3031.5	-3166	-3303	-3438.5
56	Barium	Ba	-2.88	-3.1	-2.68	-7.60775	-22.9219	-41.435	-52.515	-64.5	-78.5	-93.5	-115.765	-138.525	-193.76	-254.05	-281.55	-310.5	-339.5	-372	-406	-438.5	-471.5	-504	-583	-662.5	-698	-734.5	-780.5	-827.5	-890.5	-955.8	-1335.8	-1735.5	-1820	-1911	-2002.5	-2094.5	-2199	-2302.5	-2400.5	-2499.5	-2680.5	-2857.5	-2947.5	-3037.5	-3173.5	-3314.5	-3456.5
57	Lanthanum	La	2.11	-0.45	-3.03	-8.31795	-15.1181	-34.5637	-55.775	-67.8	-81	-96.5	-112	-135.21	-160.095	-221.885	-289	-317.5	-348	-378.5	-412	-447.5	-481	-515.5	-549.5	-631	-713.5	-750.5	-788	-835.5	-885.5	-950.5	-1017.04	-1419.55	-1842	-1929	-2021.5	-2115.5	-2210.5	-2318	-2425	-2525	-2625.5	-2812	-2993	-3084.5	-3177.5	-3319	-3465.5
58	Cerium	Ce	-3.62	-3.63	-3.09	-8.19435	-15.524	-28.478	-51.154	-71.575	-84.3	-98.5	-115.5	-132.5	-156	-182.12	-252.12	-326	-355.5	-387	-419	-453.5	-490.5	-526	-561	-596	-681	-767	-804.5	-843	-893	-944.5	-1012.5	-1081.76	-1505.76	-1951	-2040.5	-2136	-2232.5	-2329	-2439	-2550	-2653	-2756	-2946.5	-3131.5	-3225	-3320	-3468
59	Praseodymium	Pr	-2.16	-2.68	-3.22	-8.0115	-16.087	-30.302	-48.255	-69.765	-89.5	-104.5	-121.5	-139.5	-155	-179	-206.51	-283.51	-364	-395	-428.5	-461.5	-497	-535	-572	-608.5	-645	-733	-821.5	-860	-900	-952.5	-1006.5	-1076	-1146.97	-1594.47	-2063.5	-2155	-2253	-2352	-2450.5	-2564.5	-2678.5	-2783.5	-2889.5	-3084	-3273	-3369	-3465.5
60	Neodymium	Nd	8.44	-2.18	-2.85	-8.1225	-16.41	-31.25	-50.2	-72	-91.5	-106.5	-125	-144	-160	-181.5	-208	-232	-316	-404.5	-436.5	-471	-505.5	-542	-582	-620	-658	-696	-786.5	-877.5	-917.5	-958.5	-1013.5	-1070.5	-1141.5	-1214.71	-1686.21	-2179	-2272.5	-2373	-2475	-2576	-2692.5	-2809.5	-2917.5	-3026	-3224.5	-3418	-3516
61	Promethium	Pm	12.44	-2.7	-2.86	-8.241	-16.6	-31.7	-51.395	-73.345	-93	-108.5	-127	-146.5	-164.5	-188	-215.5	-238.5	-258.5	-349.5	-446	-479.5	-515.5	-551.5	-589	-630	-670	-709.5	-748.5	-841.5	-936	-977	-1019	-1076.5	-1135.5	-1209.5	-1284.85	-1779.85	-2297.5	-2393.5	-2496	-2600.5	-2703.5	-2823.5	-2944.5	-3053.5	-3164.5	-3369	-3566
62	Samarium	Sm	4.03	-2.12	-2.91	-8.35685	-17.235	-32.4	-52.03	-76.33	-96.5	-110.5	-129.5	-149.5	-168.5	-193.5	-222.5	-247	-266.5	-291.25	-390.25	-490	-524.5	-562	-599	-637.5	-680	-722	-762	-802	-899	-996	-1038	-1081.5	-1141.5	-1203	-1279	-1356.8	-1876.3	-2418.5	-2517.5	-2622.5	-2729	-2834.5	-2957.5	-3082.5	-3195	-3308	-3516
63	Europium	Eu	5.25	-3.08	-2.9	-8.46019	-18.085	-33.81	-52.85	-75.5	-96.5	-112.5	-132	-152.5	-172	-198	-228	-253	-272	-296	-327.7	-431.2	-535.5	-571.5	-610	-648.5	-688	-732	-775	-816.5	-858.5	-958	-1057.5	-1101	-1145.5	-1208	-1272.5	-1351	-1431.03	-1975.53	-2543	-2644	-2752	-2860.5	-2968	-3095	-3223.5	-3338.5	-3454
64	Gadolinium	Gd	5.38	-3.01	-3.15	-9.1199	-16.36	-32.315	-54.38	-76.88	-97.5	-114.5	-133.5	-154.5	-174	-198	-229.5	-257	-278	-303.5	-335.5	-366	-472.5	-583	-620	-659.5	-699.5	-740	-785.5	-830.5	-873	-916	-1018.5	-1121	-1165.5	-1211	-1277	-1344.5	-1424.5	-1506.67	-2076.68	-2670.5	-2773.5	-2884	-2995.5	-3105	-3236	-3368	-3487
65	Terbium	Tb	2.71	-2.94	-3.15	-8.6919	-16.715	-30.85	-53.145	-78.25	-99	-116.5	-134	-155.5	-177	-201	-233	-260	-282	-309.5	-341.5	-375.5	-409.8	-519.8	-632	-670.5	-711	-752	-794	-841	-887.5	-931.5	-975.5	-1081	-1186.5	-1232	-1278.5	-1347	-1418	-1501	-1584.69	-2180.19	-2801	-2906.5	-3019.5	-3133.5	-3244.5	-3379	-3515.5
66	Dysprosium	Dy	2.35	0.07	-3.15	-8.80445	-17.235	-32.135	-51.775	-77.54	-101.5	-118.5	-139.5	-161	-181	-208	-241.5	-269	-289.5	-316	-349	-382.5	-415	-448	-564.5	-683	-722.5	-764.5	-806.5	-849.5	-898	-946.5	-991.5	-1036.5	-1145.5	-1253.5	-1300	-1348	-1419.5	-1494	-1579	-1664.87	-2286.87	-2934.5	-3042.5	-3157.5	-3274	-3388	-3526
67	Holmium	Ho	3.86	-1.54	-3.18	-8.91075	-17.32	-32.67	-53.215	-79.465	-103.5	-120.5	-142	-164.5	-185	-212.5	-246	-273.5	-294.5	-322.5	-356.5	-390.5	-424.5	-458	-492.5	-612.5	-735	-776	-819.5	-863.5	-907	-957	-1007	-1053	-1099.5	-1211	-1323	-1370.5	-1419	-1494	-1571.5	-1658.5	-1746.28	-2395.78	-3071.5	-3181.5	-3298.5	-3417.5	-3534
68	Erbium	Er	2.95	0.47	-3.21	-9.01885	-17.335	-32.72	-53.9	-80.55	-105	-122.5	-144.5	-167.5	-189	-218	-251.5	-279	-300.5	-328	-363	-398	-432.5	-468	-503	-537.5	-662.5	-790	-831.5	-876	-921	-966	-1017.5	-1069	-1117	-1165	-1279	-1393	-1442	-1492	-1570.5	-1651.5	-1740.5	-1831	-2508	-3211	-3323	-3443	-3564.5
69	Thulium	Tm	11.69	1.08	-3.1	-9.11716	-17.865	-33.19	-54.065	-81.715	-107	-124.5	-146.5	-170	-192.5	-222	-256.5	-284.5	-306	-334.5	-369.5	-405.5	-442	-480	-515	-550	-586.5	-714	-845.5	-888.5	-934.5	-981	-1027	-1080	-1133.5	-1182	-1231	-1348.5	-1466	-1516	-1566.5	-1648.5	-1733.5	-1825	-1917.1	-2622.6	-3354.5	-3468.5	-3590.5
70	Ytterbium	Yb	12.57	2.81	-3.13	-9.21508	-18.613	-34.305	-54.57	-82.29	-108	-126	-149	-172.5	-195.5	-226.5	-261.5	-290	-312.5	-342	-378	-413.5	-450	-487	-522.5	-560	-600	-635.5	-766.5	-903	-947.5	-995	-1042	-1089.5	-1144.5	-1199.5	-1249.5	-1299.5	-1420	-1540	-1591	-1643	-1728.5	-1817	-1911.5	-2007.2	-2739.7	-3499	-3616
71	Lutetium	Lu	10.02	2.59	-2.88	-9.66293	-17.4297	-33.1047	-56.025	-82.4	-107.5	-126.5	-147.5	-172	-195	-221.5	-257	-290.5	-316.5	-344.5	-380	-418.5	-457	-498	-540	-580	-620	-655	-691.5	-827	-963	-1008.5	-1056.5	-1105.5	-1154	-1210	-1267	-1318.5	-1370	-1493	-1616	-1668.5	-1721.5	-1811	-1904	-2000	-2096.25	-2857.75	-3648
72	Hafnium	Hf	8.74	1.79	-3.47	-10.9125	-19.15	-28.315	-50.8525	-83.1875	-108	-128	-147.5	-172	-198	-219.5	-250	-290	-322	-346.5	-379	-419.5	-460.5	-500.5	-540	-585	-630	-670	-710	-751	-887	-1024.5	-1070.5	-1120	-1170.5	-1220	-1278	-1336.5	-1389.5	-1442	-1568	-1694	-1747.5	-1801.5	-1895	-1992.5	-2090.5	-2188.95	-2979.95
73	Tantalum	Ta	9.13	0.64	-3.94	-11.8748	-19.65	-29.05	-41.636	-71.1415	-106.505	-129	-149	-169.5	-196.5	-224	-248.5	-283	-321	-350.5	-379.5	-417.5	-460.5	-506	-550	-595	-640	-680	-720	-765	-811	-948	-1087	-1135	-1185.5	-1236.5	-1287.5	-1347.5	-1408	-1462	-1516	-1645	-1773.5	-1828	-1883.5	-1981.5	-2083	-2183.5	-2284.35
74	Tungsten	W	3.79	2.14	-4.35	-11.982	-21.06	-32.115	-44.9	-58.178	-93.388	-131.605	-150.7	-169.6	-193.95	-220.25	-244.95	-274.5	-308	-343.6	-374.9	-404.3	-441.4	-482.35	-523	-568.95	-617.55	-663.3	-710.05	-759.25	-808.9	-857.4	-1006.8	-1156.1	-1205.2	-1256.9	-1309.25	-1360.95	-1423.35	-1486.15	-1540.75	-1595.55	-1725.9	-1856.35	-1911.75	-1967.7	-2071.95	-2179.55	-2282
75	Rhenium	Re	3.38	0.15	-4	-12.2168	-21.8	-33.05	-45.5	-59.45	-74.855	-113.555	-154.7	-176	-197.5	-222	-252	-279.5	-310.5	-353.5	-390	-416	-452.5	-498	-545	-595	-645	-695	-740	-785	-835	-885	-931.5	-1073.5	-1218	-1268	-1321.5	-1375.5	-1428	-1492	-1556.5	-1612	-1668.5	-1804	-1939	-1995.5	-2052.5	-2160	-2271
76	Osmium	Os	7.03	-1.18	-4.76	-12.7191	-21	-33	-48	-62.55	-77.6	-93.562	-135.362	-179.35	-201.5	-224	-252	-284.5	-310	-343.5	-388.5	-423	-453	-495	-545	-595	-645	-695	-745	-795	-845	-895	-945	-992.5	-1138.5	-1286.5	-1337.5	-1392	-1447	-1501	-1567	-1633	-1690	-1748	-1886	-2024	-2082	-2140	-2252
77	Iridium	Ir	8.22	0.39	-5.27	-12.9835	-22.5	-34	-48.5	-64.5	-80.5	-97	-114	-158.9	-205.9	-228.5	-252	-283.5	-316	-342.5	-381.5	-426	-458.5	-491	-535	-585	-640	-695	-745	-795	-845	-895	-950	-1005	-1055	-1205.5	-1356	-1408.5	-1464.5	-1520.5	-1575.5	-1643.5	-1711.5	-1770	-1829	-1970	-2111	-2170	-2229.5
78	Platinum	Pt	6.96	0.53	-5.54	-13.7609	-23.7815	-36	-49.5	-65.5	-83	-100	-117.5	-135.45	-182.65	-232.7	-257	-281	-312.5	-345	-375	-418.5	-462	-493	-528.5	-580	-635	-685	-735	-790	-845	-900	-955	-1010	-1065	-1115	-1271	-1428	-1481.5	-1538	-1595.5	-1652	-1721.5	-1792	-1852	-1912	-2056	-2199.5	-2259.5
79	Gold	Au	8.28	0.4	-5.77	-14.7128	-25.1	-37.5	-52.5	-67	-84	-103	-121.05	-139.55	-158.6	-184.1	-237.5	-287	-311.5	-344.5	-378.5	-412.5	-460	-503.5	-535	-575	-625	-680	-735	-790	-845	-900	-960	-1015	-1070	-1125	-1180	-1342.5	-1501	-1555.5	-1614	-1673	-1730	-1801.5	-1874.5	-1935.5	-1996.5	-2143.5	-2290.5
80	Mercury	Hg	9.4	3.13	-5.22	-14.5971	-26.4784	-41.375	-54.875	-68.9	-84.8	-103.45	-123.95	-143.5	-163	-182.85	-234.8	-291.95	-319.5	-344.5	-379.5	-415.5	-453	-503.5	-545	-575	-620	-680	-735	-790	-850	-905	-960	-1020	-1080	-1135	-1190	-1250	-1414.5	-1576	-1632	-1692	-1751.5	-1809.5	-1883.5	-1958.5	-2020.5	-2082.5	-2233.5
81	Thallium	Tl	21.29	2	-3.24	-13.2682	-25.1291	-40.485	-56.87	-71.3	-89	-107	-125.5	-146.5	-167.5	-187.5	-208.15	-262.6	-323.45	-353	-379	-415.5	-453	-493.5	-545	-585	-620	-670	-730	-790	-850	-905	-960	-1025	-1085	-1140	-1200	-1260	-1320	-1487.5	-1653	-1710.5	-1771	-1832	-1891	-1967	-2044.5	-2107.5	-2171
82	Lead	Pb	9.53	4.22	-3.88	-11.2246	-23.4849	-37.1287	-55.56	-75.85	-91.5	-110.05	-129	-148	-170	-192.5	-213.5	-234.55	-291.6	-356.05	-387.5	-414.5	-453	-492.5	-538.5	-590	-630	-670	-720	-780	-840	-900	-960	-1020	-1085	-1150	-1210	-1270	-1330	-1395	-1567	-1732	-1789.5	-1851.5	-1914.5	-1974.5	-2052.5	-2132	-2196.5
83	Bismuth	Bi	17.99	0.74	-4.12	-11.9942	-21.1315	-35.43	-50.65	-72.15	-95.65	-112.5	-132.5	-152.05	-172.05	-195.5	-218.5	-240.5	-262.3	-321.4	-389.6	-422.5	-450	-492	-535	-585	-640	-675	-720	-780	-840	-900	-960	-1025	-1090	-1150	-1215	-1280	-1345	-1410	-1470	-1642	-1812	-1871	-1934.5	-1998	-2059.5	-2140	-2221.5
84	Polonium	Po	13.46	3.27	-5.15	-13.857	-23.15	-31.5	-46.5	-63.05	-88.55	-116.5	-135.55	-156.05	-178	-199.5	-222	-246	-269	-292.5	-360	-430	-458.5	-487.5	-531	-575	-630	-685	-720	-770	-830	-895	-960	-1025	-1090	-1150	-1215	-1285	-1350	-1410	-1475	-1540	-1717.5	-1894	-1954.5	-2019	-2083.5	-2146	-2229
85	Astatine	At	6.26	0.24	-6.05	-13.5988	-22.23	-33.115	-45.02	-61.195	-78.55	-107.6	-139.55	-159	-180.55	-202.05	-224	-249.5	-275	-299	-323	-393.5	-466.5	-495.5	-525	-570	-615	-675	-735	-770	-825	-890	-955	-1020	-1085	-1150	-1215	-1285	-1350	-1415	-1480	-1550	-1620	-1799	-1977.5	-2039	-2105	-2171	-2234.5
86	Radon	Rn	8.34	0.51	-5.38	-16.0742	-25.4	-33.15	-44.9	-58.45	-76	-95	-128	-163.95	-184.45	-206.5	-229	-252	-278.5	-305	-329.5	-354.5	-427.5	-503.5	-534	-564	-611	-661.5	-720	-780	-825	-885	-950	-1015	-1085	-1150	-1215	-1280	-1350	-1425	-1490	-1555	-1625	-1690	-1876.5	-2063.5	-2126	-2192.5	-2260
87	Francium	Fr	15.21	0.22	-2.28	-13.2364	-27.7	-36.05	-44.55	-58.5	-73.5	-93	-113	-149.5	-189.5	-211.05	-233.55	-257	-281	-308.5	-336.5	-362	-387.5	-465	-545	-575	-605	-655	-705	-770	-835	-880	-945	-1010	-1075	-1145	-1215	-1285	-1350	-1420	-1495	-1565	-1635	-1705	-1775	-1964.5	-2150.5	-2214.5	-2282
88	Radium	Ra	6.8	-0.14	-2.69	-7.71279	-20.5736	-36	-46.95	-58.45	-73	-89.5	-110.5	-132	-172.45	-215.95	-238.5	-262	-286.5	-311.5	-340	-369	-395.5	-422	-502.5	-585	-615	-645	-700	-755	-815	-880	-935	-1005	-1075	-1145	-1215	-1285	-1355	-1425	-1495	-1570	-1645	-1715	-1785	-1850	-2044	-2239.5	-2304.5
89	Actinium	Ac	0.24	-1.36	-2.76	-8.46	-14.5905	-31.1155	-49.9	-61	-73	-88.95	-106.4	-128.9	-152.5	-197.05	-244	-267	-292	-317.5	-342.5	-372.5	-403	-430	-457	-540	-625	-655	-690	-745	-800	-870	-935	-990	-1065	-1135	-1205	-1275	-1345	-1420	-1495	-1570	-1645	-1715	-1785	-1860	-1935	-2134	-2330
90	Thorium	Th	2.53	-1.38	-3.35	-9.10335	-15.95	-24.4	-43.4	-63.55	-75.55	-88.5	-106.5	-125.5	-149	-173	-221.5	-273.5	-297.5	-323	-349	-375.5	-406.5	-437.5	-465.5	-494	-579	-665	-700	-735	-790	-865	-935	-990	-1050	-1125	-1200	-1275	-1345	-1420	-1495	-1565	-1640	-1720	-1795	-1870	-1955	-2030	-2225
91	Protactinium	Pa	-1.24	-1.39	-3.14	-8.895	-15.45	-24.95	-37.6	-58.15	-78.55	-92	-104.95	-124	-145	-170	-195	-247.5	-304	-329	-355.5	-382	-409	-441.5	-474	-503	-532	-618	-705	-740	-775	-835	-900	-970	-1040	-1105	-1185	-1260	-1335	-1410	-1485	-1560	-1635	-1715	-1795	-1870	-1955	-2030	-2095
92	Uranium	U	6.41	-1.6	-3.29	-8.39705	-15.2	-28.25	-41.35	-53	-74.5	-95	-108.5	-122.5	-143.5	-165.5	-191.5	-218.5	-275	-335.5	-361.5	-388.5	-416.5	-444.5	-477.5	-511	-541	-571	-657.5	-750	-785	-820	-885	-950	-1020	-1090	-1160	-1250	-1325	-1400	-1480	-1555	-1630	-1710	-1790	-1870	-1950	-2030	-2105
93	Neptunium	Np	1.83	-1.35	-3.29	-8.88285	-15.6	-26.75	-40.9	-56.5	-78.5	-99.5	-114	-128.5	-143.5	-165	-187.5	-214.5	-242.5	-303.5	-368.5	-395	-423	-452	-480.5	-515	-550	-580.5	-611	-698	-790	-830	-865	-930	-1000	-1075	-1150	-1225	-1320	-1395	-1470	-1550	-1630	-1705	-1780	-1865	-1950	-2030	-2105
94	Plutonium	Pu	0.22	-2.7	-3.07	-8.613	-16.1	-28	-42	-64.5	-87.5	-102	-116.5	-131.5	-149	-169	-189.5	-209.5	-238.5	-268	-333.5	-402.5	-430	-459	-488.5	-517.5	-553.5	-590	-621	-652.5	-744	-835	-870	-910	-980	-1050	-1125	-1200	-1280	-1380	-1460	-1540	-1620	-1700	-1780	-1855	-1940	-2030	-2110
95	Americium	Am	0.66	-0.93	-3.03	-8.8369	-16.7	-29.25	-43.4	-58.95	-81.45	-102.5	-118	-133.5	-151.5	-173	-195	-215.5	-233.5	-263	-294.5	-364.5	-437.5	-466	-496	-526	-556	-593.5	-631	-663	-695.5	-785.5	-880	-920	-960	-1035	-1110	-1185	-1260	-1345	-1450	-1530	-1610	-1695	-1780	-1860	-1940	-2025	-2115
96	Curium	Cm	1.27	-0.92	-3.16	-7.9957	-15.05	-28.9	-44.35	-60.05	-83.05	-104.5	-120	-136	-155.5	-178.5	-201	-223.5	-244	-262.5	-291.5	-321.5	-396	-474.5	-503.5	-534	-565	-595.5	-634	-673	-706	-739	-832.5	-930	-970	-1010	-1085	-1160	-1240	-1320	-1410	-1520	-1600	-1685	-1770	-1850	-1935	-2020	-2110
97	Berkelium	Bk	-	-	-3.11445	-9.04895	-16.75	-28.8	-46	-63.05	-80.05	-102	-122	-138.5	-159	-183	-206.5	-229	-249.5	-269	-291	-321	-350	-429	-511.5	-541.5	-573.5	-605.5	-636.5	-676	-716.5	-750.5	-784	-880	-980	-1020	-1060	-1140	-1220	-1300	-1385	-1480	-1590	-1675	-1760	-1845	-1930	-2010	-2095
98	Californium	Cf	-	-	-3.14985	-9.04085	-17.1	-30.05	-44.8	-63.45	-83	-101.95	-122.95	-142.5	-165	-190	-213.5	-236	-256	-275.5	-298	-322	-351	-379	-463	-551	-581.5	-613.5	-646	-678.5	-719.5	-761	-796	-830.5	-928.5	-1030	-1070	-1105	-1185	-1275	-1360	-1440	-1540	-1660	-1745	-1835	-1920	-2005	-2090
99	Einsteinium	Es	-	-	-3.211	-9.21	-17.35	-30.75	-46.45	-62.55	-84	-104.95	-124.95	-147	-168.5	-193	-218.5	-241.5	-261	-282	-305.5	-329.5	-354.5	-382.5	-409.5	-498.5	-591	-622	-655	-688.5	-721.5	-764	-807	-842.5	-878	-977.5	-1080	-1120	-1160	-1245	-1335	-1420	-1505	-1610	-1735	-1825	-1910	-1995	-2085
100	Fermium	Fm	-	-	-	-8.25	-16.6	-31.25	-47.15	-64.5	-83.5	-106.5	-128	-149	-173.5	-197	-223	-247	-266.5	-288	-313	-338.5	-364	-389.5	-416	-441.5	-534.5	-631.5	-663.5	-698	-732.5	-765.5	-809.5	-854	-890	-926.5	-1027	-1130	-1170	-1210	-1300	-1395	-1485	-1575	-1685	-1815	-1900	-1985	-2075
101	Mendelevium	Md	-	-	-	-8.29	-17.15	-32.15	-47.05	-65.05	-86	-105.55	-129.5	-152.95	-174.5	-201	-227.5	-250	-271	-294.5	-320.5	-347	-373	-399	-425	-450	-474	-572.5	-674.5	-706.5	-741.5	-777	-811	-856.5	-902.5	-939	-976	-1077	-1180	-1225	-1270	-1360	-1455	-1550	-1640	-1750	-1885	-1975	-2065
102	Nobelium	No	-	-	-	-9.575	-19.15	-33.65	-50.75	-67	-85.5	-108	-129.5	-155	-178.5	-201.5	-231	-256.5	-278.5	-301	-326.5	-354	-380.5	-407	-434	-461.5	-485.5	-508	-610.5	-717.5	-751	-786.5	-822.5	-857.5	-904.5	-951.5	-989.5	-1027.5	-1132.5	-1240	-1280	-1320	-1420	-1525	-1615	-1705	-1825	-1965	-2060
103	Lawrencium	Lr	-	-	-2.90961	-9.82711	-17.85	-32.5	-49.8	-68	-88	-108.5	-132	-154	-181	-206.5	-230	-256.5	-279.5	-305	-332	-359	-388.5	-417	-445.5	-473.5	-498.5	-525	-550	-652.5	-762	-796.5	-833	-870	-905	-953.5	-1002.5	-1040.5	-1079.5	-1189	-1300	-1340	-1385	-1490	-1595	-1690	-1785	-1910	-2055
							Chemical Hardness of Atoms and Atomic Ions (eV) from the Parr-Pearson formula
											Charge
Atomic #	Element	Symbol	-2	-1	0	1	2	3	4	5	6	7	8	9	10	11	12	13	14	15	16	17	18	19	20	21	22	23	24	25	26	27	28	29	30	31	32	33	34	35	36	37	38	39	40	41	42	43	44
1	Hydrogen	H	0	-	12.84	92
2	Helium	He	0	0.52	24.59	29.8304	135
3	Lithium	Li	0	1.9	4.77	70.2483	46.8143
4	Beryllium	Be	0	2.7	9.32	8.88844	135.685	63.822
5	Boron	B	0	5.68	8.02	16.8568	12.7758	221.445	80.8506
6	Carbon	C	0	8.02	10	13.123	23.5045	16.6061	327.593	97.9063
7	Nitrogen	N	2.6	6.46	14.53	15.0672	17.8479	30.0243	20.4167	454.182	114.974
8	Oxygen	O	5.4	9.61	12.16	21.503	19.8144	22.478	36.4855	24.2207	601.17	132.12
9	Fluorine	F	0	5.39	14.02	17.548	27.7376	24.4314	27.103	42.9223	28.0209	768.725	149.206
10	Neon	Ne	0	1.39	21.56	19.3984	22.487	33.67	29.09	31.72	49.3459	31.823	956.73	166.371
11	Sodium	Na	0	3.63	4.59	42.1473	24.3336	27.29	39.49	33.78	36.32	55.75	35.614	1165.26	183.581
12	Magnesium	Mg	1.8	2.52	7.65	7.38904	65.1084	29.1218	32.0045	45.49	38.26	40.94	62.1	39.44	1394.31	200.86
13	Aluminum	Al	1.5	5.16	5.55	12.8428	9.6191	91.5444	33.833	36.665	51.27	42.9	45.47	68.62	43.25	1643.98	218.161
14	Silicon	Si	2.3	5.97	6.76	8.19416	17.1472	11.6488	121.625	38.503	41.23	57.04	47.58	50.25	74.99	47.06	1914.21	235.552
15	Phosphorus	P	3.8	6.67	9.74	9.28281	10.4332	21.2412	13.5812	155.396	43.149	46.03	62.53	52.27	55.06	81.34	50.94	2205.17	252.932
16	Sulfur	S	0	7.71	8.28	12.9779	11.4521	12.432	25.3725	15.4585	192.895	47.802	50.8	67.95	57.3	59.64	87.76	54.81	2516.77	270.409
17	Chlorine	Cl	0	5.43	9.35	10.846	15.7964	13.8552	14.3348	29.23	17.1658	234.084	51.78	55.57	73.65	62.71	64.72	93.05	59.64	2849.12	287.775
18	Argon	Ar	0	9.12	15.76	11.8701	13.1103	19.07	15.21	15.989	33.314	19.137	278.99	56.24	60.27	79.3	67.84	69.64	99.03	63.26	3202.86	305.344
19	Potassium	K	0	-	3.84	27.2893	14.176	15.104	21.75	16.74	18.16	37.32	20.9374	327.983	60.9	64.7	85.2	72	74.5	106.9	65.4	3577.4	323.246
20	Calcium	Ca	0	-	6.09	5.75856	39.0414	16.3569	17.23	24.28	18.42	20.04	41.3	22.735	380.625	65.3	69.4	91	76.9	79.5	113	70.8	3971	341.064
21	Scandium	Sc	0	-	6.37	6.23828	11.9569	48.7327	18.1606	19.03	27.32	20.1	21.93	45.15	24.618	437.562	69.34	74.1	96.7	81.5	85	119	74.97	4386.83	358.912
22	Titanium	Ti	0	-	6.75	6.74738	13.9162	15.7755	56.0328	20.23	21.27	29.6	21.7	23.82	49.15	26.43	496.34	75.26	78.8	102.1	87	90	125	79.4	4823.6	376.82
23	Vanadium	V	0	-	6.22	7.87181	14.693	17.398	18.5727	62.8483	22.47	22.8	32.4	24.7	25.2	52.4	28.177	559.723	80	84	108	92	95	131	83.6	5281.7	394.82
24	Chromium	Cr	0	0.31	6.09	9.71919	14.4743	18.2	20.3	21.1749	69.5451	24.52	24.6	35.1	26.4	27.2	56.8	29.368	626.432	86.4	88	114	97	100	138	87.4	5760.3	413.11
25	Manganese	Mn	0	4.51	7.43	8.20598	18.028	17.532	21.2	23.2	23.603	75.297	27.3	26.5	37.7	28.4	29.2	59.4	32.163	699.537	89.3	93	120	102	105	144	91.9	6260.7	431.34
26	Iron	Fe	0	-	7.75	8.2853	14.4643	24.148	20.2	24.1	25.88	26.08	82.54	28.5	28.1	40.6	30.2	31.2	64.8	32.256	776.744	92	98	126	107	110	151	73	6805	449.69
27	Cobalt	Co	6	3.64	7.22	9.20299	16.416	17.8	28.2	22.5	26.9	28.9	28.33	89.27	29.6	31	43	32	33	67.96	34.62	850.62	107.4	98.4	132	111	116	157	100	7325.1	468.02
28	Nickel	Ni	0	5.67	6.48	10.529	17.0212	19.71	21.16	31.94	25	29	31	31.6	96.4	31	32	46	34	35	72.08	35.98	933.94	107	108	138	117	120	164	104.2	7889.6	486.6
29	Copper	Cu	0	5.24	6.49	12.566	16.5486	20.539	22.42	23.2	36	27	33	33	33.3	103.7	32	34	49	36	37	76	37.588	1026.41	107	112	144	122	126	170	109.5	8474.88	505.237
30	Zinc	Zn	0	2.62	9.39	8.57019	21.7586	19.677	23.2	25.4	26	40	29	35	36	36.8	108.9	34.3	36	52	37	40	79	40	1118	105	124	129	144	133.5	178.4	112.096	9082.94	523.989
31	Gallium	Ga	0	5	5.57	14.5158	10.1949	33.29	22.01	26.69	28.1	29.2	41	33	36	39	37	115.2	37.62	39.49	51.49	40.2	37	88.7	41.608	1202.69	119	129	133	152.9	139.1	185	116.426	9712.13	542.931
32	Germanium	Ge	3.3	4.42	6.67	8.03518	18.2895	11.489	47.7869	22.4	29	31.5	36.1	39.6	33.9	40	41	40	120.9	39.39	41.77	53.74	47.2	34	93.1	43.344	1299.66	123.9	135	136	162.2	144.7	192.1	120.293	10363.1	562.009
33	Arsenic	As	0.4	6.93	8.98	8.8006	9.7618	21.779	12.5	64.97	19.4	33	33	34	49	37	42	43	42	127.6	41.22	44.08	56	45.1	40	97.7	45.091	1400.21	129	140	140	172	150.1	198.9	124.643	11036	581.228
34	Selenium	Se	0	5.45	7.73	11.4376	9.6304	12.1246	25.355	13.4	73.7	28.6	35	36	36	51.9	40.1	43	47	44	133.5	42.88	46.42	58.2	47.8	41.2	102.6	46.762	1504.34	133.3	146	144	182	155.8	205.2	129.526	11731	600.592
35	Bromine	Br	0	5.57	8.45	9.7772	14.409	11.3	12.4	28.9	14.4	89.8	31.2	37	40	37	55	43	45	49	47	139.3	44.69	48.81	60.2	50.8	42.2	107.6	48.569	1611.83	139	150	149	192	162.1	211.9	133.986	12448	620.116
36	Krypton	Kr	0	5.68	14	10.3602	12.5902	15.55	12.2	13.8	32.5	14.802	105.048	37.35	39.8	42	41	56	45	49	51	49	145	47	51	53	61	53	100	54.3	1722.7	142	157	154	203	168	219	138.083	13187.3	639.788
37	Rubidium	Rb	0	1.12	3.69	23.1124	12.7105	12.6	18.4	13.4	14.8	36.8	14	127.1	36	42.9	44	43	59	48	51	53	52	151	48.3	53.6	65.1	56	45	117.5	52.067	1838.73	147.7	161	158	215	173	226	142.865	13949	659.627
38	Strontium	Sr	0	0.55	5.64	5.33525	31.8599	14.11	14.6	19.2	15.2	16.3	39.7	15	147.1	37.9	46	46	45	63	50	53	57	52	158	50.1	55.9	67	60	46	122.4	53.79	1957.51	152.3	167	166	223	179	233	147.397	14733.2	679.643
39	Yttrium	Y	0	1.03	5.91	6.0067	8.296	40.077	16.403	16	23	13	17.2	44.8	15	168	40	49	49	47	65	53	56	57	57	163	51.9	58.3	69.8	63	47	127.6	55.518	2079.78	157.1	172	168	239	185	240	151.73	15540	699.834
40	Zirconium	Zr	0	2.94	6.21	6.4661	9.89	11.35	46.008	15.922	15.73	21.7	19.3	19.02	42.88	21.35	189.75	44	50	53	49	68	55	58	60	59	170	52.7	60.7	71.6	67	48	133.1	57.271	2205.63	162	177	173	253	191	247	155.935	16369.5	720.211
41	Niobium	Nb	0	2.49	5.86	7.24115	11.04	13.26	12.25	51.507	22.943	11	23.2	20.8	20.28	45.82	22.49	213.91	47.5	51	55	52	70	58	61	63	60	176	54.6	63.1	74.3	71	61	125.9	59.069	2335.13	166.9	182	171	275	196	254	161.065	17222	740.755
42	Molybdenum	Mo	0	4	6.35	9.06757	10.97	19.27	8.09	14.3376	56.8364	17.936	20.52	22.28	22.9	20.98	48.82	23.5	241.4	26	66	66	65	66	69	66	52	62	181	60	64	62	86	66	129.1	60.832	2468.07	171	188	182	284	203	261	165.194	18097.5	761.497
43	Technetium	Tc	0	4.13	6.73	7.98	14.28	11.46	16	15	16	62	19	20.9	24.1	25	23.08	48.92	27.55	265.45	51	58	60	56	75	64	64	70	64	188	57.6	67.9	79.5	79	51	149	62.28	2604.72	176	193	186	301	209	268	170.391	18996.1	782.458
44	Ruthenium	Ru	0	2.48	6.28	9.3995	11.71	16.53	14	17	17	17	68.4	19.6	21.9	25.1	26	24.9	52.1	28.25	293.75	53	61	61	60	76	67	67	72	66	194	59.7	70.3	82	84	51	155	64.037	2744.96	181	197	194	317	215	275	174.72	19918.2	803.606
45	Rhodium	Rh	2.9	-	6.32	10.6211	12.98	10.94	21	17	17	18.1	19.9	72.51	20.49	24.1	24.9	29	25.58	57.42	27	323	55	63	64	63	77	70	71	72	70	200	60.9	72.7	85.4	88	52	160	66.224	2888.78	185	203	194	340	221	283	179.262	20863.7	824.978
46	Palladium	Pd	0	5.8	7.77	11.0931	13.5	13.07	15	23.1	16.9	19	21	19	78.57	21.43	26	25	31	27.1	57.9	31	352	59	64	67	65	80	73	72	76	72	206	62.2	75.1	87.7	93	54	165	67.867	3035.13	191	208	197	362	227	290	184.096	21832.9
47	Silver	Ag	0	5.79	6.27	13.9012	13.3525	14.17	16	17	24	19	20	22	21	83.46	22.54	27	26	34	27.43	60.57	31.87	384.13	61	67	69	67	82	77	74	78	75	212	63.5	77.5	91	98	54	171	69.989	3186.01	195	213	204	381	233	298	189.297
48	Cadmium	Cd	0	3.17	8.99	7.91449	20.5717	13.52	16.9	19.1	18	25.1	19.9	23	22	23	87	24	29	27	36	31.55	60.45	33.19	416.81	63	69	72	70	83	80	77	81	77	217	65.9	80	93.1	104	55	177	71.615	3340.39	200	218	203	410	239	305
49	Indium	In	2.6	2.06	5.4	13.0839	9.1597	25.97	15.3	20.7	19	21.1	25.9	22	23	25	23	92	27	28	29	37	35.11	62.89	33.38	449.62	66	72	74	73	85	83	79	84	79	223	67.5	82.5	96	110	56	182	73.774	3497.23	205	223	216	426	246
50	Tin	Sn	5.4	5.59	6.23	7.28828	15.8704	10.2324	31.545	21.72	18.9	22.1	21	28	24	24	26	24	97	28	30	29	40	31	71	34.35	484.65	68	74	78	74	87	88	80	87	81	230	68.1	84.9	99	117	56	188	75.5	3658.5	210	228	221	451
51	Antimony	Sb	3.6	7.13	7.56	8.02161	8.67	18.9	11.8	52	9	22	23	23	29	24	27	27	25	103	27	32	31	42	32	73	36.26	520.74	71	75	81	77	88	92	83	88	85	236	76	83	79	139	87	161	85	3814	215	238	223
52	Tellurium	Te	0	5.83	7.04	9.5904	9.36	9.45	21.34	11.95	66.3	6	24	24.1	23.9	30	27	27	29	26	107	30	31	33	44	34	76	37.12	557.88	73	78	83	80	89	96	86	90	87	243	77	86	80	148	88	166	87	3981	221	242
53	Iodine	I	1.7	6.84	7.39	8.68004	13.8687	7.36	11.157	22.853	13.24	63.2	20.19	26	23.9	26.1	32	28	28	30	28	112	30	34	32	48	34	79	38.76	596.24	75	81	86	81	92	99	88	94	88	250	79	88	82	156	94	166	89.5	4151.5	263
54	Xenon	Xe	0	2.16	12.13	8.84516	11.148	10.077	11.94	12.563	24.897	14.3778	73.8622	22.16	27.02	25.98	26	33	29	31	30	26	119	33	34	34	50	36	82	39.03	635.97	78	82	89	84	93	104	90	96	91	256	81	89	85	164	93	175	90.8	4326.2
55	Cesium	Cs	0	-	3.42	19.2635	10.0376	9.805	13	13.1	13.8	27.19	15.52	87.69	19.7	28	28	27	36	30	31	32	31	121	32	37	34	53	38	84	41.07	675.93	80	85	91	88	93	108	93	99	93	261	84	92	86	173	96	178	93
56	Barium	Ba	0	0.1	5.07	4.79217	25.8362	11.19	10.97	13	15	15	29.53	15.99	94.48	26.1	28.9	29	29	36	32	33	33	32	126	33	38	35	57	37	89	41.6	718.4	81	88	94	89	95	114	93	103	95	267	87	93	87	185	97	187
57	Lanthanum	La	0	-	5.11	5.4821	8.1183	30.7727	11.65	12.4	14	17	14	32.42	17.35	106.23	28	29	32	29	38	33	34	35	33	130	35	39	36	59	41	89	44.09	760.91	84	90	95	93	97	118	96	104	97	276	86	97	89	194	99
58	Cerium	Ce	0	-	4.91	5.3113	9.348	16.56	28.792	12.05	13.4	15	19	15	32	20.24	119.76	28	31	32	32	37	37	34	36	34	136	36	39	38	62	41	95	43.53	804.47	86	93	98	95	98	122	100	106	100	281	89	98	92	204
59	Praseodymium	Pr	0	-	4.51	5.077	11.074	17.356	18.55	24.47	15	15	19	17	14	34	21.02	132.98	28	34	33	33	38	38	36	37	36	140	37	40	40	65	43	96	45.94	849.06	89	94	102	96	101	127	101	109	103	286	92	100	93
60	Neodymium	Nd	0	-	5.36	5.195	11.38	18.3	19.6	24	15	15	22	16	16	27	26	22	146	31	33	36	33	40	40	36	40	36	145	37	43	39	71	43	99	47.42	895.58	90	97	104	100	102	131	103	113	104	293	94	102
61	Promethium	Pm	0	4.03	5.45	5.318	11.4	18.8	20.59	23.31	16	15	22	17	19	28	27	19	21	161	32	35	37	35	40	42	38	41	37	149	40	42	42	73	45	103	47.7	942.3	93	99	106	103	103	137	105	113	109	300	94
62	Samarium	Sm	0	-	5.48	5.4263	12.33	18	21.26	27.34	13	15	23	17	21	29	29	20	19	30.5	167.5	32	37	38	36	41	44	40	40	40	154	40	44	43	77	46	106	49.6	989.4	95	103	107	106	105	141	109	116	110	306
63	Europium	Eu	0	1.11	5.55	5.57962	13.67	17.78	20.3	25	17	15	24	17	22	30	30	20	18	30	33.4	173.6	35	37	40	37	42	46	40	43	41	158	41	46	43	82	47	110	50.06	1038.94	96	106	110	107	108	146	111	119	112
64	Gadolinium	Gd	0	1.92	6.01	5.9402	8.54	23.37	20.76	24.24	17	17	21	21	18	30	33	22	20	31	33	28	185	36	38	41	39	42	49	41	44	42	163	42	47	44	88	47	113	51.35	1088.65	99	107	114	109	110	152	112	126
65	Terbium	Tb	0	2.67	5.43	5.6562	10.39	17.88	26.71	23.5	18	17	18	25	18	30	34	20	24	31	33	35	33.6	186.4	38	39	42	40	44	50	43	45	43	168	43	48	45	92	50	116	51.38	1139.62	102	109	117	111	111	158	115
66	Dysprosium	Dy	0	1	5.59	5.7311	11.13	18.67	20.61	30.92	17	17	25	18	22	32	35	20	21	32	34	33	32	34	199	38	41	43	41	45	52	45	45	45	173	43	50	46	97	52	118	53.74	1190.26	105	111	119	114	114	162
67	Holmium	Ho	0	-	5.68	5.7785	11.04	19.66	21.43	31.07	17	17	26	19	22	33	34	21	21	35	33	35	33	34	35	205	40	42	45	43	44	56	44	48	45	178	46	49	48	102	53	121	54.57	1244.43	107	113	121	117	116
68	Erbium	Er	0	2.92	5.8	5.8223	10.81	19.96	22.4	30.9	18	17	27	19	24	34	33	22	21	34	36	34	35	36	34	35	215	40	43	46	44	46	57	46	50	46	182	46	52	48	109	53	125	56	1298	108	116	124	119
69	Thulium	Tm	0.5	2.23	6.17	5.86569	11.63	19.02	22.73	32.57	18	17	27	20	25	34	35	21	22	35	35	37	36	40	30	40	33	222	41	45	47	46	46	60	47	50	48	187	48	52	49	115	55	128	56.2	1354.8	109	119	125
70	Ytterbium	Yb	0	3.53	6.25	5.92184	12.874	18.51	22.02	33.42	18	18	28	19	27	35	35	22	23	36	36	35	38	36	35	40	40	31	231	42	47	48	46	49	61	49	51	49	192	48	54	50	121	56	133	58.4	1406.6	112	122
71	Lutetium	Lu	0.7	-	5.09	8.47414	7.0594	24.2906	21.55	31.2	19	19	23	26	20	33	38	29	23	33	38	39	38	44	40	40	40	30	43	228	44	47	49	49	48	64	50	53	50	196	50	55	51	128	58	134	58.5	1464.5	116
72	Hafnium	Hf	0	6.6	6.71	8.17493	8.3	10.03	35.045	29.625	20	20	19	30	22	21	40	40	24	25	40	41	41	39	40	50	40	40	40	42	230	45	47	52	49	50	66	51	55	50	202	50	57	51	136	59	137	59.9	1522.1
73	Tantalum	Ta	4.3	5.3	7.23	8.65043	6.9	11.9	13.272	45.739	24.989	20	20	21	33	22	27	42	34	25	33	43	43	48	40	50	40	40	40	50	42	232	46	50	51	51	51	69	52	56	52	206	51	58	53	143	60	141	60.7
74	Tungsten	W	0	5.91	7.05	8.23597	9.92	12.19	13.38	13.176	57.244	19.19	19	18.8	29.9	22.7	26.7	32.4	34.6	36.6	26	32.8	41.4	40.5	40.8	51.1	46.1	45.4	48.1	50.3	49	48	250.8	47.8	50.4	53	51.7	51.7	73.1	52.5	56.7	52.9	207.8	53.1	57.7	54.2	154.3	60.9	144
75	Rhenium	Re	0	1.98	7.68	8.76648	10.4	12.1	12.8	15.1	15.71	61.69	20.6	22	21	28	32	23	39	47	26	26	47	44	50	50	50	50	40	50	50	50	43	241	48	52	55	53	52	76	53	58	55	216	54	59	55	160	62
76	Osmium	Os	2.3	3.16	7.36	8.56177	8	16	14	15.1	15	16.924	66.676	21.3	23	22	34	31	20	47	43	26	34	50	50	50	50	50	50	50	50	50	50	45	247	49	53	56	54	54	78	54	60	56	220	56	60	56	168
77	Iridium	Ir	2.9	6.68	7.4	8.03298	11	12	17	15	17	16	18	71.8	22.2	23	24	39	26	27	51	38	27	38	50	50	60	50	50	50	50	50	60	50	50	251	50	55	57	55	55	81	55	62	56	226	56	62	57
78	Platinum	Pt	0	5.32	6.83	9.6042	10.437	14	13	19	16	18	17	18.9	75.5	24.6	24	24	39	26	34	53	34	28	43	60	50	50	50	60	50	60	50	60	50	50	262	52	55	58	57	56	83	58	62	58	230	57	63
79	Gold	Au	0	5.41	6.92	10.9745	9.8	15	15	14	20	18	18.1	18.9	19.2	31.8	75	24	25	41	27	41	54	33	30	50	50	60	50	60	50	60	60	50	60	50	60	265	52	57	60	58	56	87	59	63	59	235	59
80	Mercury	Hg	0.9	3.71	10.44	8.3193	15.4432	14.35	12.65	15.4	16.4	20.9	20.1	19	20	19.7	84.2	30.1	25	25	45	27	48	53	30	30	60	60	50	60	60	50	60	60	60	50	60	60	269	54	58	62	57	59	89	61	63	61	241
81	Thallium	Tl	0	4.74	5.73	14.3201	9.4017	21.31	11.46	17.4	18	18	19	23	19	21	20.3	88.6	33.1	26	26	47	28	53	50	30	40	60	60	60	60	50	60	70	50	60	60	60	60	275	56	59	62	60	58	94	61	65	62
82	Lead	Pb	0	-	7.05	7.61585	16.9048	10.3827	26.48	14.1	17.2	19.9	18	20	24	21	21	21.1	93	35.9	27	27	50	29	63	40	40	40	60	60	60	60	60	60	70	60	60	60	60	70	274	56	59	65	61	59	97	62	67
83	Bismuth	Bi	0	3.37	6.34	9.4175	8.857	19.74	10.7	32.3	14.7	19	21	18.1	21.9	25	21	23	20.6	97.6	38.8	27	28	56	30	70	40	30	60	60	60	60	60	70	60	60	70	60	70	60	60	284	56	62	65	62	61	100	63
84	Polonium	Po	0	-	6.51	10.886	7.7	9	21	12.1	38.9	17	21.1	19.9	24	19	26	22	24	23	112	28	29	29	58	30	80	30	40	60	60	70	60	70	60	60	70	70	60	60	70	60	295	58	63	66	63	62	104
85	Astatine	At	0	6.06	6.52	8.56249	8.7	13.07	10.74	21.61	13.1	45	18.9	20	23.1	19.9	24	27	24	24	24	117	29	29	30	60	30	90	30	40	70	60	70	60	70	60	70	70	60	70	60	80	60	298	59	64	68	64	63
86	Radon	Rn	0	4.8	10.75	10.6515	8	7.5	16	11.1	24	14	52	19.9	21.1	23	22	24	29	24	25	25	121	31	30	30	64	37	80	40	50	70	60	70	70	60	70	60	80	70	60	70	70	60	313	61	64	69	66
87	Francium	Fr	0	1.41	3.59	18.3273	10.6	6.1	10.9	17	13	26	14	59	21	22.1	22.9	24	24	31	25	26	25	130	30	30	30	70	30	100	30	60	70	60	70	70	70	70	60	80	70	70	70	70	70	309	63	65	70
88	Radium	Ra	0	0	5.18	4.86873	20.8529	10	11.9	11.1	18	15	27	16	64.9	22.1	23	24	25	25	32	26	27	26	135	30	30	30	80	30	90	40	70	70	70	70	70	70	70	70	70	80	70	70	70	60	328	63	67
89	Actinium	Ac	0	3.47	4.82	6.58	5.681	27.369	10.2	12	12	19.9	15	30	17.2	71.9	22	24	26	25	25	35	26	28	26	140	30	30	40	70	40	100	30	80	70	70	70	70	70	80	70	80	70	70	70	80	70	328	64
90	Thorium	Th	0	-	5.94	5.5933	8.1	8.8	29.2	11.1	12.9	13	23	15	32	16	81	23	25	26	26	27	35	27	29	28	142	30	40	30	80	70	70	40	80	70	80	70	70	80	70	70	80	80	70	80	90	60	330
91	Protactinium	Pa	0	1.18	5.51	6.01	7.1	11.9	13.4	27.7	13.1	13.8	12.1	26	16	34	16	89	24	26	27	26	28	37	28	30	28	144	30	40	30	90	40	100	40	90	70	80	70	80	70	80	70	90	70	80	90	60	70
92	Uranium	U	0	-	5.82	4.4059	9.2	16.9	9.3	14	29	12	15	13	29	15	37	17	96	25	27	27	29	27	39	28	32	28	145	40	30	40	90	40	100	40	100	80	70	80	80	70	80	80	80	80	80	80	70
93	Neptunium	Np	0	-	5.95	5.2343	8.2	14.1	14.2	17	27	15	14	15	15	28	17	37	19	103	27	26	30	28	29	40	30	31	30	144	40	40	30	100	40	110	40	110	80	70	80	80	80	70	80	90	80	80	70
94	Plutonium	Pu	0	-	5.94	5.174	9.8	14	14	31	15	14	15	15	20	20	21	19	39	20	111	27	28	30	29	29	43	30	32	31	152	30	40	40	100	40	110	40	120	80	80	80	80	80	80	70	100	80	80
95	Americium	Am	0	-	5.9	5.7262	10	15.1	13.2	17.9	27.1	15	16	15	21	22	22	19	17	42	21	119	27	30	30	30	30	45	30	34	31	149	40	40	40	110	40	110	40	130	80	80	80	90	80	80	80	90	90
96	Curium	Cm	-	0.52	5.67	4.0086	10.1	17.6	13.3	18.1	27.9	15	16	16	23	23	22	23	18	19	39	21	128	29	29	32	30	31	46	32	34	32	155	40	40	40	110	40	120	40	140	80	80	90	80	80	90	80	100
97	Berkelium	Bk	-	-	6.17	5.7021	9.7	14.4	20	14.1	19.9	24	16	17	24	24	23	22	19	20	24	36	22	136	29	31	33	31	31	48	33	35	32	160	40	40	40	120	40	120	50	140	80	90	80	90	80	80	90
98	Californium	Cf	-	-	6.2637	5.5183	10.6	15.3	14.2	23.1	16	21.9	20.1	19	26	24	23	22	18	21	24	24	34	22	146	30	31	33	32	33	49	34	36	33	163	40	40	30	130	50	120	40	160	80	90	90	80	90	80
99	Einsteinium	Es	-	-	6.418	5.58	10.7	16.1	15.3	16.9	26	15.9	24.1	20	23	26	25	21	18	24	23	25	25	31	23	155	30	32	34	33	33	52	34	37	34	165	40	40	40	130	50	120	50	160	90	90	80	90	90
100	Fermium	Fm	-	-	-	3.5	13.2	16.1	15.7	19	19	27	16	26	23	24	28	20	19	24	26	25	26	25	28	23	163	31	33	36	33	33	55	34	38	35	166	40	40	40	140	50	130	50	170	90	80	90	90
101	Mendelevium	Md	-	-	-	3.42	14.3	15.7	14.1	21.9	20	19.1	28.8	18.1	25	28	25	20	22	25	27	26	26	26	26	24	24	173	31	33	37	34	34	57	35	38	36	166	40	50	40	140	50	140	40	180	90	90	90
102	Nobelium	No	-	-	-	5.85	13.3	15.7	18.5	14	23	22	21	30	17	29	30	21	23	22	29	26	27	26	28	27	21	24	181	33	34	37	35	35	59	35	41	35	175	40	40	40	160	50	130	50	190	90	100
103	Lawrencium	Lr	-	-	4.88922	8.94578	7.1	22.2	12.4	24	16	25	22	22	32	19	28	25	21	30	24	30	29	28	29	27	23	30	20	185	34	35	38	36	34	63	35	41	37	182	40	40	50	160	50	140	50	200	90
[truncated: 59 more columns]
